1 **Title:**

2 **Spatiotemporal dynamics of self-generated imagery reveal a reverse cortical hierarchy from**  
3 **cue-induced imagery**

4 **Authors:**

5 Yiheng Hu<sup>1,2</sup>, Qing Yu<sup>1,\*</sup>

6 **Affiliations:**

7 <sup>1</sup>Institute of Neuroscience, Center for Excellence in Brain Science and Intelligence Technology,  
8 Chinese Academy of Sciences, Shanghai, China

9 <sup>2</sup>University of Chinese Academy of Sciences, Beijing, China

10

11 **\*Correspondence should be addressed to:**

12 Qing Yu

13 Institute of Neuroscience, Center for Excellence in Brain Science and Intelligence Technology,

14 Chinese Academy of Sciences

15 Shanghai, 200031, China

16 Email: [qingyu@ion.ac.cn](mailto:qingyu@ion.ac.cn)

17

18

19

20 **Keywords:** visual imagery, frontal cortex, early visual cortex, reverse hierarchy, self-generated

21 imagery; fMRI; EEG

22

23

## 24 **Abstract**

25 Visual imagery, the ability to generate visual experience in the absence of direct external stimulation,  
26 allows for the construction of rich internal experience in our mental world. Most imagery studies to  
27 date have focused on cue-induced imagery, namely the to-be-imagined contents were triggered by  
28 external cues. It has remained unclear how internal experience derives volitionally in the absence  
29 of any external cues, and whether this kind of self-generated imagery relies on an analogous cortical  
30 network as cue-induced imagery. Here, leveraging a novel self-generated imagery paradigm, we  
31 systematically examined the spatiotemporal dynamics of self-generated imagery, by having  
32 participants volitionally imagining one of the orientations from a learned pool; and of cue-induced  
33 imagery, by having participants imagining line orientations based on associative cues acquired  
34 previously. Using electroencephalography (EEG) and functional magnetic resonance imaging  
35 (fMRI), in combination with multivariate encoding and decoding approaches, our results revealed  
36 largely overlapping neural signatures of cue-induced and self-generated imagery in both EEG and  
37 fMRI; yet, these neural signatures displayed substantially differential sensitivities to the two types  
38 of imagery: self-generated imagery was supported by an enhanced involvement of anterior cortex  
39 in generating and maintaining imagined contents, as evidenced by enhanced neural representations  
40 of orientations in sustained potentials in central channels in EEG, and in posterior frontal cortex in  
41 fMRI. By contrast, cue-induced imagery was supported by enhanced neural representations of  
42 orientations in alpha-band activity in posterior channels in EEG, and in early visual cortex in fMRI.  
43 These results jointly support a reverse cortical hierarchy in generating and maintaining imagery  
44 contents in self-generated versus externally-cued imagery.

45

## 46 **Introduction**

47 Visual imagery is the ability to generate visual experience from the internal world, in the absence  
48 of direct external stimulation <sup>1</sup>. It remains a fundamental capability of human cognition, and is  
49 central to the understanding of how our mental world is constructed. Unlike visual perception which  
50 is primarily driven by physical external stimulation and can be measured via standardized paradigms,  
51 visual imagery by definition involves cognitive processes that are ambiguous and difficult to  
52 measure in nature. Consequently, various behavioral paradigms have been used to study visual  
53 imagery; these paradigms might fundamentally differ in the exact cognitive processes involved, yet

54 most of them share a cue-induced nature in common, namely the contents of imagery are induced  
55 by externally presented cues. Overall, two types of imagery tasks are most frequently used: the first  
56 type of imagery task employs semantic <sup>2-4</sup> or associative cues <sup>5</sup> to trigger retrieval of imagery  
57 contents from long-term memory. In these tasks, the to-be-imagined contents are not directly  
58 accessible on the screen, but can only be inferred from long-term memory. The other type of imagery  
59 task utilizes retrocues <sup>6,7</sup> or mental rotation cues <sup>8,9</sup> to access specific memorized contents  
60 maintained or manipulated in working memory. These cue-induced imagery tasks, albeit  
61 significantly differed in their way to cue imagery, have led to several consistent observations in  
62 visual imagery: first, imagery and perception share common neural codes in early visual cortex for  
63 simple visual features <sup>8</sup>, in object-selective high-level visual cortex for complex visual objects <sup>2,10</sup>.  
64 and in alpha-band activity in electroencephalography (EEG) <sup>4</sup>, suggesting the depictive nature of  
65 visual imagery; second, neural processing during imagery follows a reverse cortical hierarchy from  
66 that during perception, which is supported by larger spatial overlap of univariate BOLD activations  
67 between imagery and perception in higher-order frontoparietal than in occipitotemporal cortex <sup>3</sup>; an  
68 increased top-down signal flow in imagery compared to perception, from frontal <sup>11,12</sup> or parietal <sup>13</sup>  
69 to occipital cortex; and a reversal of object representations from high-level to low-level visual cortex  
70 <sup>2,14,15</sup>. These findings together indicated that visual imagery involves a distributed cortical network  
71 from low-level visual cortex to higher-level visual and frontoparietal cortex <sup>3,16</sup>, and provided  
72 empirical support for the reverse visual hierarchy model, which proposes that, as opposed to  
73 perception which triggers a feedforward sweep of neural activations along the posterior-to-anterior  
74 cortical hierarchy, imagery is initiated by top-down signals generated in higher-level cortex that  
75 trigger a cascade of neural processing in the downstream cortical areas eventually <sup>1,17</sup>.

76 However, imagery experience by definition can be generated in the absence of any external  
77 stimulation, including external cues. In this context, imagery is entirely perception- or cue-  
78 independent, and the contents of imagery are self-generated from the internal world. This self-  
79 generated imagery can be regarded as a part of self-generated cognitive processes, during which an  
80 internal experience arises from intrinsic changes within an individual, rather than extrinsic changes  
81 cued from the external environment <sup>18</sup>. As such, self-generated imagery is much less prone to  
82 external influences, and may better reflect “pure” internally-generated mental processes. Although  
83 there have been studies on self-generated cognitive processes related to imagery, such as recalling

84 memories, envisioning the future, and mind wandering<sup>18,19</sup>, those studies engaged complex  
85 cognitive processes wherein imagery was only a part of the processes. The neural mechanism of  
86 pure self-generated imagery has remained elusive. Specifically, it remains unclear whether self-  
87 generated imagery works fundamentally differently from cue-induced imagery, and whether the  
88 neural principles with classic cue-induced imagery paradigms would hold with self-generated  
89 imagery.

90 Given that self-generated and cue-induced imagery differ primarily in the origin of imagery  
91 contents, it is plausible that when participants orient internally and determine their imagery contents  
92 volitionally, the reverse cortical hierarchy might be involved differently from that during cue-  
93 induced imagery. A previous study has observed increased decoding performance of imagined  
94 objects, as opposed to degraded decoding performance of perceived objects, from low-level to high-  
95 level visual cortex<sup>2</sup>. The rationale is that if one brain region serves as the neural locus that initiates  
96 imagery contents signals at the top of the reverse hierarchy, this region should demonstrate better  
97 decoding performance of imagined than perceived contents, compared to other downstream brain  
98 regions. With this logic, we would expect to see differential representational signals between self-  
99 generated and cue-induced imagery along a reverse hierarchy of imagery, due to the internal origin  
100 of self-generated imagery.

101 Here we set out to address these questions by comparing the neural processes underlying self-  
102 generated imagery with those of cue-induced imagery. To study self-generated imagery in well-  
103 controlled settings and to reduce ambiguity in imagery contents, participants' imagery contents were  
104 constrained to a pool of seven fixed line orientations throughout the experiment. In self-generated  
105 imagery, participants determined their imagery content freely without any associative sensory input,  
106 one at a time from the seven orientations on each trial; In cue-induced imagery, participants  
107 imagined one orientation based on an externally-presented associative cue, and the associations  
108 between orientations and cues were learned prior to the task. We investigated the spatiotemporal  
109 dynamics of these two types of imagery in a series of two experiments, using EEG (in Experiment  
110 1) and fMRI (in Experiment 2), respectively. In both experiments, neural representations of imagery  
111 contents were characterized using inverted encoding models (IEMs), which have been shown to be  
112 a powerful tool in unveiling population-level, feature-selective representations across visual,  
113 parietal, and frontal cortex in the visual working memory literature<sup>20-22</sup>.

114 To preview, across two experiments, we demonstrated self-generated and cue-induced imagery  
115 shared common neural representations within multiple neural signatures, while preserving  
116 substantial differences in terms of the strength of representations at different levels of cortical  
117 hierarchy: in EEG, enhanced orientation representations were observed in self-generated imagery  
118 compared to cue-induced imagery in sustained potentials in central channels, and the opposite was  
119 true in alpha-band oscillatory activity in posterior channels. In fMRI, enhanced orientation  
120 representations were observed in self-generated imagery in right superior precentral sulcus (sPCS)  
121 of frontal cortex, and the reverse was true in early visual cortex (EVC). In other words, the relative  
122 representational strength of self-generated and cue-induced imagery also followed a frontal-to-  
123 occipital reverse hierarchy. Together, these results provided the first empirical evidence, to our  
124 knowledge, that frontal cortex plays a critical role in the generation and maintenance of self-  
125 generated imagery contents, supporting and extending the reverse hierarchy theory of imagery.

126

## 127 **Results**

### 128 *EEG Behavior results*

129 In Experiment 1, participants performed an imagery task along with EEG recording (Figure 1A),  
130 during which their imagery contents were either cued by one of seven pairs of learned associations  
131 between kaleidoscope images and line orientations (Cue-induced Imagery), or self-generated from  
132 the same set of seven orientations (Self-generated Imagery). During the learning session,  
133 participants successfully acquired the associations between kaleidoscope images and line  
134 orientations with their mean absolute recall errors being below 10°. During the EEG session,  
135 participants performed the cue-induced imagery task with a mean absolute recall error of 9.47° (SD  
136 = 14.28°).

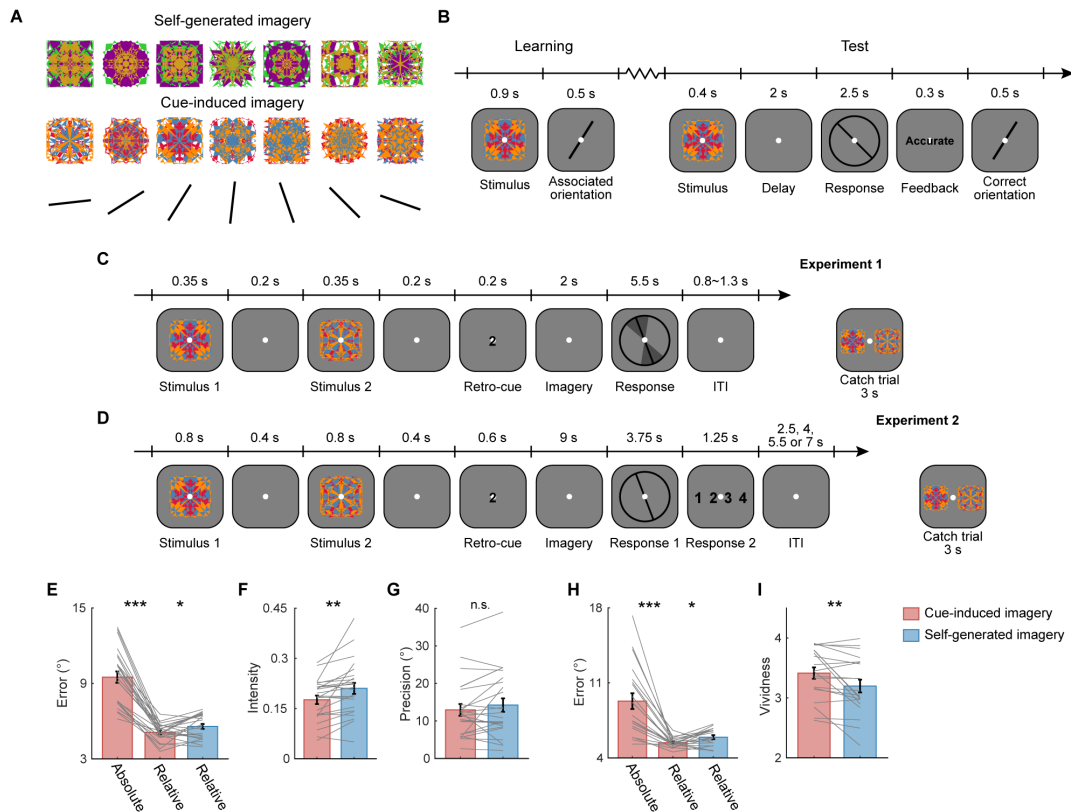

137

138 **Figure 1.** Experimental paradigms and behavioral results.

139 A. Kaleidoscope images and line orientations used in the current study. Two sets of kaleidoscope  
 140 images were used, each consisted of seven distinct images. The specific set of kaleidoscope  
 141 used for each condition (cue-induced or self-generated imagery) was counterbalanced across  
 142 participants. The specific association between each kaleidoscope image and each orientation was  
 143 also randomized across participants. B. Trial structure of learning and test tasks. On learning trials,  
 144 participants passively viewed one kaleidoscope image, followed by its associated line orientation.  
 145 On test trials, participants viewed one kaleidoscope image, and were required to report its associated  
 146 orientation. Feedback was provided at the end of each trial. C-D. Trial structure of the main task. A  
 147 similar trial structure was used in Experiments 1 (C) and 2 (D), and only the timing of events and  
 148 the type of responses differed. Each trial began with the presentation of two consecutive  
 149 kaleidoscope images followed by a retrocue. In cue-induced imagery, participants actively imagined  
 150 the line orientation associated with the cued kaleidoscope image during delay; in self-generated  
 151 imagery, participants freely chose one from the seven learned orientations and imagined the self-  
 152 generated orientation during delay. In Experiment 1, participants reported the imagined orientation,  
 153 the precision, and the intensity of their imagery; In Experiment 2, participants reported the imagined  
 154 orientation and 1-4 points of vividness rating. Catch trials were interleaved to maintain participants'  
 155 attention on the kaleidoscope images, and participants needed to choose the cued kaleidoscope from  
 156 two probe images after retrocue. E-I. Behavioral performance in Experiments 1 and 2. E. Results of  
 157 mean recall error in each condition (absolute recall error in cue-induced imagery, and relative recall  
 158 error in both conditions) of Experiment 1. Colored bars indicate group mean (error bars denote  $\pm 1$   
 159 SEM), gray lines indicated results from individual participants. Asterisks on top denote significance  
 160 of pairwise comparisons between conditions, n.s., not significant, \*:  $p < 0.05$ , \*\*:  $p < 0.01$ , \*\*\*:  $p$

161 < 0.001. F. Same as E, but with results of intensity of imagery experience in Experiment 1. G. Same  
162 as F, but with results of precision of imagery experience in Experiment 1. H. Same as E, but with  
163 results from Experiment 2. I. Same as E, but with results of vividness rating of Experiment 2.

164

165 Because there were no correct answers on self-generated imagery trials, to compare the  
166 behavioral performance between conditions, we took the least circular distance of responses to the  
167 seven specific orientations as relative recall errors in both conditions. We first showed that relative  
168 and absolute errors correlated with each other in cue-induced imagery ( $r = 0.54$ ,  $p = 0.006$ ; Figure  
169 S1A), suggesting relative error may be treated as an approximation of absolute error when the latter  
170 was not available in self-generated imagery. Meanwhile, relative error was significantly smaller  
171 than absolute error in cue-induced imagery,  $t(23) = 11.25$ ,  $p < 0.001$ . When comparing relative error  
172 between conditions, we found that the mean relative error in cue-induced imagery ( $5.11^\circ \pm 3.58^\circ$ )  
173 was slightly but significantly smaller than that in self-generated imagery ( $5.58^\circ \pm 3.72^\circ$ ),  $t(23) =$   
174  $2.49$ ,  $p = 0.020$  (Figure 1E). Furthermore, because participants were required to randomly select one  
175 from seven learned orientations in self-generated imagery, we examined whether participants'  
176 responses were biased towards specific orientation bins. We binned all responses into seven bins,  
177 each centered at one of the seven orientations (Figure S2A, S2B). We observed a slight bias in  
178 participants' response distribution in both conditions. To avoid potential influence of these biases  
179 on subsequent neural analyses, we balanced the number of trials within each response bin for all  
180 neural analyses (see Methods for details). Lastly, we confirmed that participants did not respond by  
181 simply entering the initial orientation of the response wheel (Figure S2C, S2D). Together, these  
182 results suggested that participants faithfully followed task instructions and randomly selected one  
183 from seven orientations in self-generated imagery.

184 Besides recall errors, participants were also measured on the vividness of their imagery, by  
185 reporting both the precision (as characterized by the angle of the response wedge) and the intensity  
186 (as characterized by the darkness of the response wedge) of their imagery experience. Overall,  
187 participants' subjective experience was more vivid in cue-induced imagery than in self-generated  
188 imagery: participants reported a more intense imagery experience in cue-induced imagery ( $0.18 \pm$   
189  $0.13$ ) compared to in self-generated imagery ( $0.21 \pm 0.14$ ) condition,  $t(23) = 3.37$ ,  $p = 0.003$  (Figure  
190 1F). On the contrary, difference in precision between conditions was numerically but not statistically  
191 different ( $12.96^\circ \pm 11.47^\circ$  in cue-induced imagery;  $14.24^\circ \pm 12.48^\circ$  in self-generated imagery;  $t(23)$

192 = 1.43,  $p = 0.17$ ; Figure 1G). These results indicated that self-generated imagery produced an  
193 attenuation of subjective experience in terms of subjective intensity, but not in subjective precision.  
194 Moreover, in self-generated imagery, precision significantly correlated with intensity ( $r = 0.58$ ,  $p =$   
195  $0.003$ , Figure S1C) and relative errors ( $r = 0.40$ ,  $p = 0.050$ , Figure S1D) across participants, while  
196 the correlation between intensity and relative errors was not significant ( $r = 0.07$ ,  $p = 0.747$ , Figure  
197 S1H). Follow-up stepwise regression analysis confirmed that intensity and relative error explained  
198 distinct variance in precision ( $ps = 0.002$  and  $0.032$ , respectively). In comparison, no correlation  
199 was observed between any two of the behavioral measures in cue-induced imagery ( $rs < 0.40$ ,  $ps >$   
200  $0.05$ ).

201

### 202 ***Sustained potentials and alpha-band oscillatory activity showed differential sensitivity to self-*** 203 ***generated and cue-induced imagery***

204 Having established that participants could faithfully perform the self-generated imagery task  
205 following task instructions, we next seek to investigate neural signals that could potentially  
206 distinguish self-generated from cue-induced imagery. For this purpose, we chose to focus on  
207 stimulus-specific neural representations of imagery contents (i.e., orientations in the current study).  
208 Specifically, we used participants' responses on each trial to reconstruct population-level,  
209 orientation-selective representations from EEG signals using multivariate inverted encoding models  
210 (IEMs). This approach has been successfully applied to investigate orientation representations in  
211 various cognitive functions, for both maintenance in working memory<sup>20,21</sup> and retrieval from long-  
212 term memory<sup>23</sup>. Previous studies have successfully decoded imagery contents from alpha-band<sup>4</sup> as  
213 well as voltage signals<sup>6</sup> in EEG. On the other hand, recent studies on working memory<sup>24,25</sup> indicated  
214 that alpha power and sustained potentials in EEG might reflect signals from distinct cognitive  
215 processes. Given the close link between imagery and working memory<sup>8</sup>, here we performed IEM  
216 analyses on both voltage and alpha-band (8 – 12 Hz) oscillatory signals (Figure 2A), to investigate  
217 whether voltage and oscillatory signals played differential roles in self-generated and cue-induced  
218 imagery.

219



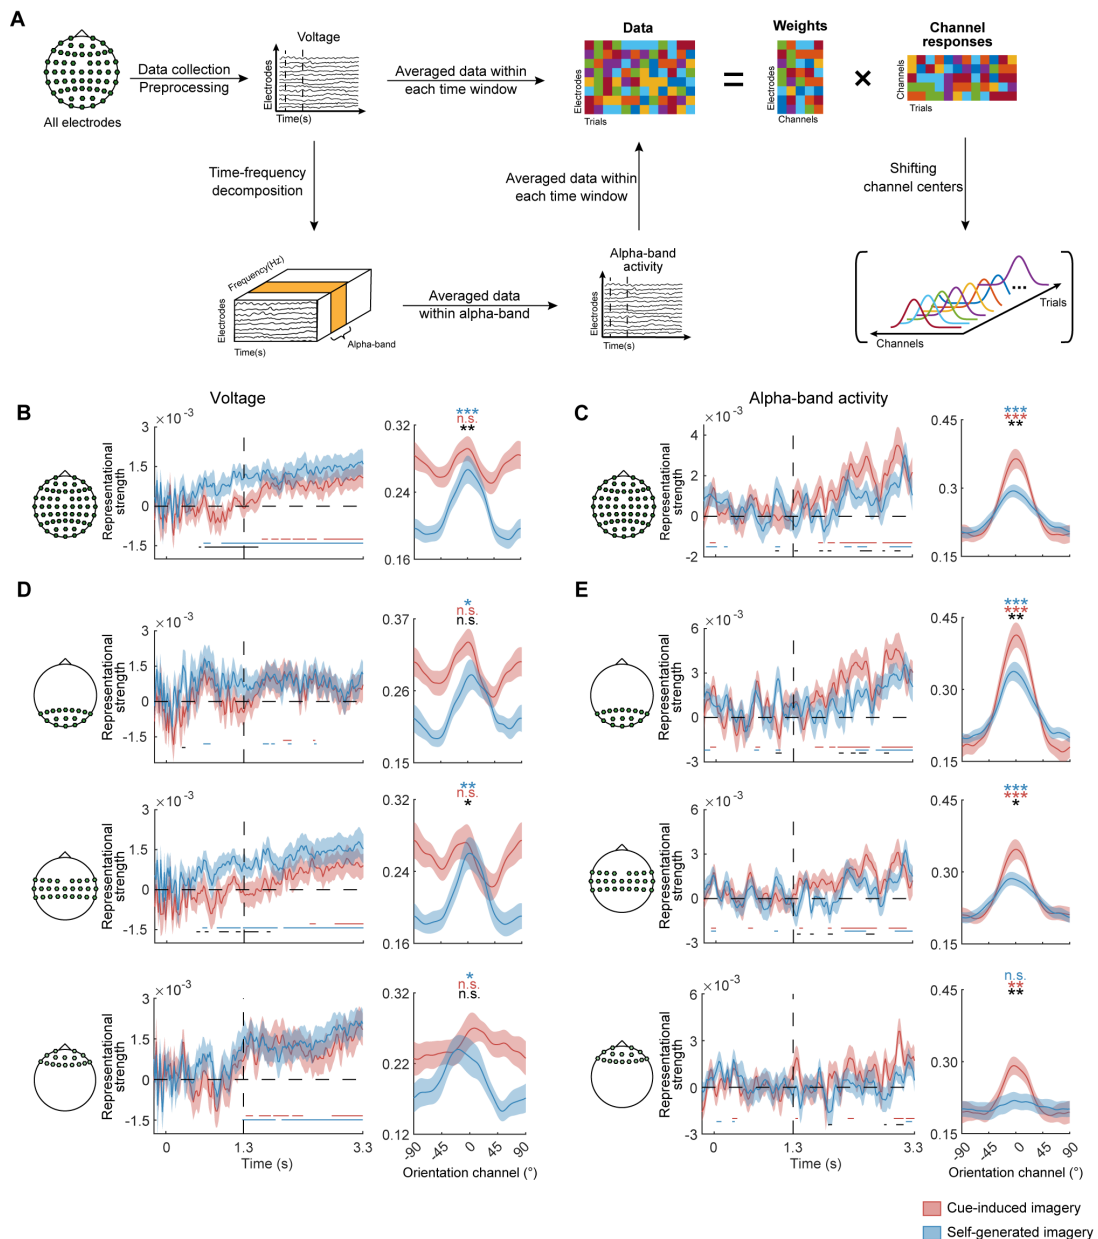

220

221 **Figure 2.** EEG analysis pipeline and results.

222 A. Pipeline of EEG analyses. Raw EEG data were collected for all electrodes. After preprocessing,  
 223 preprocessed voltage data were fed into IEM analyses. Alternatively, preprocessed voltage data  
 224 underwent time frequency decomposition, and the obtained power data of different frequency bands  
 225 were fed into IEM analyses. B. IEM results from voltage data in all electrodes. The left panel shows  
 226 time course of the strength of orientation reconstructions in cue-induced (red) and self-generated  
 227 imagery (blue), from -0.2 s prior to stimulus onset until end of delay. Y axis denotes orientation  
 228 representational strength, quantified using the slope of orientation reconstructions. Colored lines at  
 229 the bottom denote significant time points of the corresponding condition, corrected for multiple  
 230 comparisons using a cluster-based permutation method ( $p < 0.01$ ). The vertical dashed line denotes  
 231 onset of delay (at 1.3 s). The horizontal dashed line denotes baseline of reconstructions. Shaded  
 232 areas denote error bars ( $\pm 1$  SEM). The right panel shows orientation reconstructions averaged over  
 233 the selected time period of significance (0.6 – 1.7 s), in cue-induced (red) and self-generated imagery

234 (blue). X axis represents distance from response orientations, with 0 representing the response  
235 orientation of each trial. Y axis represents reconstructed orientation channel responses in arbitrary  
236 units. Colored asterisks denote significance of the corresponding condition, and black asterisk  
237 denotes significance of difference between conditions. n.s., not significant, \*:  $p < 0.05$ , \*\*:  $p < 0.01$ ,  
238 \*\*\*:  $p < 0.001$ . C. same as B, but with results from alpha-band power data in all electrodes, and  
239 orientation reconstructions were computed over a time window of 2-3.3 s. D. IEM results from  
240 voltage data in posterior (top), central (middle), and frontal (bottom) electrodes, using the same  
241 analyses and illustrations as in B. E. IEM results from alpha-band power data in posterior (top),  
242 central (middle), and frontal (bottom) electrodes, using the same analyses and illustrations as in C.  
243

244 Our results demonstrated that imagined orientations were represented in both voltage and  
245 oscillatory signals during memory delay. Interestingly, the temporal evolution of imagery  
246 representations significantly differed in these two types of signals: in voltage signals, significant  
247 representations of self-generated imagined orientations ramped up around retrocue period (0.6 s  
248 after trial onset) and sustained till the end of delay; whereas significant representations of cue-  
249 induced imagined orientations emerged later in time and was much less stable (Figure 2B; all results  
250 reported here and in subsequent analyses were corrected for multiple comparisons using a cluster-  
251 based permutation method). We quantified this difference by comparing the representational  
252 strength of self-generated imagery and that of cue-induced imagery during a temporal epoch around  
253 retrocue (0.6 – 1.7 s after trial onset): the representational strength of orientations in self-generated  
254 imagery was significant,  $t(23) = 3.97$ ,  $p = 0.0003$ , and was significantly higher than that in cued-  
255 induced imagery,  $t(23) = 3.15$ ,  $p = 0.002$ . Meanwhile, the representational strength of orientations  
256 in cue-induced imagery did not reach significance,  $t(23) = 0.14$ ,  $p = 0.447$ . By contrast, in alpha-  
257 band activity, significant and stable representations of both self-generated and cue-induced  
258 imagined orientations ramped up around midway into the delay (2 s after trial onset; Figure 2C).  
259 Moreover, when comparing the representational strength of imagery between conditions, a reversed  
260 pattern was observed during late delay (2 - 3.3s): the representational strength of orientations in  
261 self-generated imagery was significantly weaker than that in cue-induced imagery,  $t(23) = 3.18$ ,  $p =$   
262 0.002. To validate the opposite results in voltage and oscillatory signals, we sorted participants'  
263 responses into seven bins and performed multi-class classification on binned orientations using  
264 support vector machines (SVMs). Representational differences between conditions in both alpha-  
265 band and voltage signals remained during late delay (2 - 3.3s) with the decoding approach (Figure  
266 S3). This result confirmed that the observed pattern was robust across different analytical

267 approaches used to reveal orientation representations.

268 To examine the spatial configuration of electrodes that might have contributed to the  
269 representational differences between conditions, we restricted the IEM analyses to frontal, central  
270 and posterior EEG electrodes, respectively. We found that, for voltage signals, only central  
271 electrodes showed earlier emergence of self-generated representations, and stronger orientation  
272 representations in self-generated than in cue-induced imagery ( $t(23) = 2.31, p = 0.015$ ; Figure 2D),  
273 suggesting that self-generated representations might primarily derive from central electrodes  
274 activity. In frontal and posterior electrodes, only self-generated imagery demonstrated weak  
275 orientation representations, and no difference remained in terms of either temporal dynamics or  
276 representational strength between conditions (frontal:  $t(23) = 1.97, p = 0.030$  in self-generated  
277 imagery,  $t(23) = 0.80, p = 0.217$  in difference; posterior:  $t(23) = 2.12, p = 0.022$  in self-generated  
278 imagery,  $t(23) = 1.13, p = 0.134$  in difference). In alpha-band activity, the representational strength  
279 of orientations in cue-induced imagery was higher than that in self-generated imagery in posterior  
280 electrodes ( $t(23) = 2.96, p = 0.004$ ; Figure 2E). Similar but weaker patterns were observed in central  
281 ( $t(23) = 2.21, p = 0.018$ ) and frontal electrodes ( $t(23) = 3.44, p = 0.001$ ). In addition, to examine the  
282 specificity of the effect to alpha-band activity, we repeated the analyses across frequencies ranging  
283 from 3 to 45 Hz in posterior electrodes. We confirmed that among all frequencies, alpha-band  
284 demonstrated the strongest orientation representations, as well as differences between conditions.  
285 In addition, similar results were also observed in part of beta- and theta-band, but the effects were  
286 overall weaker and less stable (Figure S4).

287 In Experiment 1, we demonstrated that while self-generated and cue-induced imagery shared  
288 representations in both voltage and alpha-band oscillatory signals, the strength of orientation  
289 representations carried in these two types of signals significantly differed between conditions in at  
290 least two aspects: first, orientation representations in self-generated imagery was stronger than those  
291 in cue-induced imagery in voltage signals, and the reverse was true in alpha-band signals. Second,  
292 difference in voltage signals was mainly contributed by central electrodes, while difference in  
293 oscillatory signals was mainly contributed by posterior electrodes. Because the trial structure of  
294 these two conditions were identical, and the only difference was that imagery contents were  
295 determined by different sources (self-generated versus externally-cued), we speculated that the  
296 differences in signal types and spatial configurations might have reflected differences in internally-

297 generated versus externally-driven imagery: voltage signals from more anterior electrodes might  
298 have reflected contents derived from self-generated imagery, and alpha oscillations from more  
299 posterior electrodes might have carried information related to externally-driven processing. This  
300 anterior versus posterior contrast in the spatial layout of electrodes might reflect a reverse hierarchy  
301 in processing information from self-generated versus externally-cued imagery. However, due to the  
302 limited spatial resolution of EEG signals, we refined our approach in a second experiment during  
303 which we leveraged fMRI to investigate possible neural loci of the reverse hierarchy.

304

### 305 *fMRI Behavior results*

306 In order to identify brain regions that might underlie the representational differences between  
307 cue-induced and self-generated imagery in voltage and alpha-band signals, we had participants  
308 performed the imagery task inside an MRI scanner in Experiment 2. The procedure of Experiment  
309 2 was similar to that of Experiment 1, except that the timing of events and type of responses were  
310 adjusted to better suit for fMRI. Specifically, the delay period was prolonged to compensate for the  
311 sluggishness of BOLD signals, and vividness rating of 1-4 points was used in order to shorten the  
312 response time inside the scanner (Figure 1D).

313 The behavioral results in Experiment 2 largely replicated those in Experiment 1: the mean  
314 absolute error in cue-induced imagery was  $9.30^\circ$  (SD =  $14.15^\circ$ ); the mean relative errors were  $5.41^\circ$   
315 (SD =  $3.64^\circ$ ) in cue-induced imagery and  $5.94^\circ$  (SD =  $3.71^\circ$ ) in self-generated imagery. Relative  
316 errors were significantly smaller in cue-induced compared to self-generated imagery,  $t(19) = 2.78$ ,  
317  $p = 0.012$  (Figure 1H). In terms of vividness rating, participants reported a more vivid experience  
318 in cue-induced imagery ( $3.42 \pm 0.63$ ) than in self-generated imagery ( $3.20 \pm 0.71$ ),  $t(19) = 2.98$ ,  $p$   
319  $= 0.008$  (Figure 1I). Moreover, vividness did not correlate with relative errors in either condition,  $r_s$   
320  $< 0.24$ ,  $p_s > 0.32$ . In combination with results from Experiment 1, these results together suggested  
321 that precision and intensity likely reflected two different dimensions of vividness, with intensity  
322 producing qualitatively similar measures as vividness ratings.

323

### 324 **Whole-brain identification of representations of imagined orientations**

325 To localize brain regions showing differences in representations of imagined orientations between  
326 self-generated and cue-induced imagery, we conducted a whole-brain searchlight analysis in

327 combination with IEM. Considering a typical hemodynamic lag of 4-6 s, the searchlight was  
328 performed on data of the memory delay period (9 -12 s). Significance of searchlight results were  
329 evaluated using one-tailed t-test ( $p < 0.05$ ) and multiple comparison correction (FWE-corrected  $p <$   
330 0.01) to obtain the statistical parametric maps.

331 The whole-brain searchlight revealed largely overlapping brain regions for both cue-induced and  
332 self-generated imagery: significant clusters with robust neural representations of imagined  
333 orientations were found in a distributed network of cortical regions, including primary visual cortex  
334 (V1), extrastriate cortex, intraparietal sulcus (IPS), middle and superior temporal sulcus (STS), left  
335 superior precentral sulcus (sPCS), left superior medial gyrus and left middle and inferior frontal  
336 gyrus. Besides these common brain regions with shared neural representations, additional clusters  
337 were identified separately for the two conditions: in cue-induced imagery, imagined orientations  
338 were represented in right inferior frontal sulcus (Figure 3A); in self-generated imagery, imagined  
339 orientations were represented in right sPCS and right rostral lateral prefrontal cortex (rIPFC; Figure  
340 3B).

341 Previous studies have revealed shared representations of perception and imagery in EVC. In the  
342 current study, participants were not exposed to physical line orientations in either condition  
343 throughout the imagery task. To investigate the nature of the imagery representations and to verify  
344 that participants did engage visual imagery in Experiment 2, we had participants performed a  
345 perception task of orientations inside the scanner following the main imagery task. We then trained  
346 an IEM with perception data, and tested the perception model on imagery data in a second  
347 “perception” searchlight analysis. The perception searchlight revealed similar clusters in visual  
348 cortex (Figure S5), confirming a perception-like neural representation of orientations in our imagery  
349 task. Additionally, similar clusters in STS for both conditions, as well as bilateral superior parietal  
350 lobule and sPCS in self-generated imagery, were also identified using this perception searchlight.

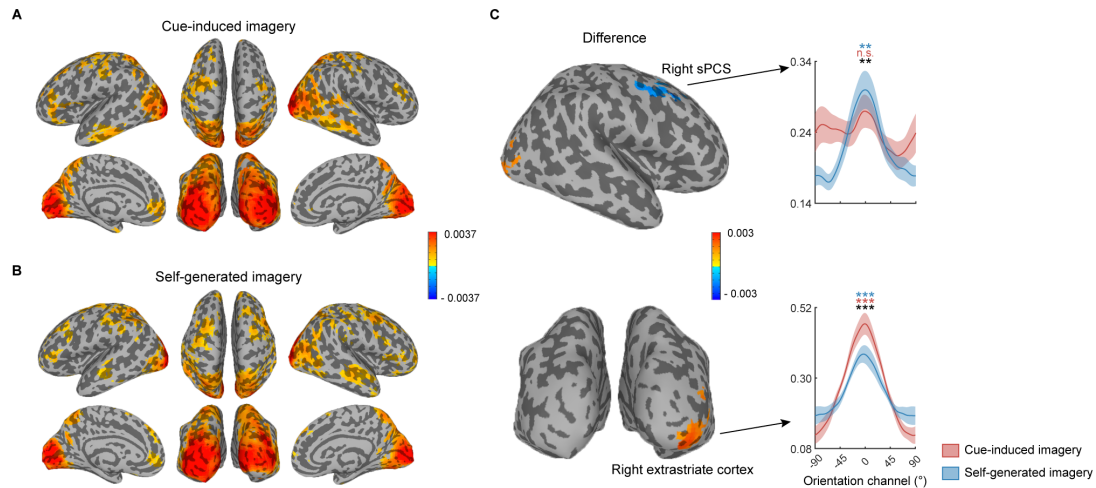

351

352 **Figure 3.** Whole-brain neural representations of imagery contents in late delay.

353 A. Searchlight parametric map of the strength of orientation representations in late delay (9-12 s; 6  
354 s after retrocue) in cue-induced imagery. Colors on the cortical surface denote brain regions with  
355 significant orientation representations, corrected using a cluster-based permutation method ( $p <$   
356 0.01). For demonstration purposes, clusters were thresholded at 50 voxels. B. Same as A, but with  
357 results from self-generated imagery. C. Difference map of orientation representations in A and B,  
358 with positive values denoting stronger orientation representations in cue-induced imagery, and  
359 negative values denoting stronger orientation representations in self-generated imagery. Orientation  
360 reconstructions obtained from the two significant clusters were shown, with right sPCS (top panel)  
361 demonstrating stronger orientation representations in self-generated imagery, and right extrastriate  
362 cortex demonstrating stronger orientation representations in cue-induced imagery. X axis represents  
363 distance from response orientations, with 0 representing the response orientation of each trial. Y  
364 axis represents reconstructed orientation channel responses in arbitrary units. Colored asterisks  
365 denote significance of cue-induced (red) and self-generated (blue) imagery, and black asterisk  
366 denotes significance of difference between conditions. n.s., not significant, \*:  $p < 0.05$ , \*\*:  $p < 0.01$ ,  
367 \*\*\*:  $p < 0.001$ .

368

369 After identifying brain clusters with robust orientation representations in the two imagery  
370 conditions, we next seek to identify clusters with significant representational differences between  
371 the two. We found significant lateralization of representational differences between conditions, with  
372 right sPCS demonstrating stronger orientation representations in self-generated imagery, and right  
373 extrastriate cortex demonstrating stronger orientation representations in cue-induced imagery  
374 (Figure 3C). To better illustrate the effects, we extracted multi-voxel activation patterns from the  
375 two regions of interest (ROIs) and generated reconstructions of imagined orientations of both  
376 conditions in each ROI. The representational strength of orientations in self-generated imagery was  
377 significantly higher than that in cue-induced imagery in right sPCS ( $t(19) = 3.13, p = 0.003$ ). Notably,

378 orientation reconstruction was significant in self-generated imagery ( $t(19) = 3.54, p = 0.001$ ), but  
379 not in cue-induced imagery ( $t(19) = 0.69, p = 0.250$ ). In addition, the representational strength of  
380 orientations in cue-induced imagery was higher than that in self-generated imagery in right  
381 extrastriate cortex ( $t(19) = 3.76, p = 0.001$ ), with significant orientation representations in both  
382 conditions ( $t(19) = 6.32, p < 0.001$  in cue-induced imagery,  $t(19) = 3.79, p = 0.001$  in self-generated  
383 imagery). This posterior versus anterior differences in orientation representations resembled our  
384 findings in Experiment 1 which showed differential results in posterior and anterior electrodes.

385 If enhanced neural representations of orientations in sPCS supported the generation and  
386 maintenance of self-generated imagery, we would anticipate the representational strength of  
387 orientations in this region should be predictive of that in lower-level extrastriate cortex. Indeed,  
388 Pearson correlation analysis between the two revealed significant positive correlation in self-  
389 generated imagery (Figure S6B),  $r = 0.48, p = 0.034$ , but less so in cue-induced imagery (Figure  
390 S6A),  $r = 0.4, p = 0.077$ .

391 Lastly, as a control, we repeated the searchlight analysis on data from an earlier epoch of the trial  
392 (Figure 4, 6-9 s; 3 s after the retrocue). The representational strength of orientations in cue-induced  
393 imagery was significantly higher than that in self-generated imagery in bilateral V1 ( $t(19) = 3.76, p$   
394  $= 0.001$ ) and right extrastriate cortex ( $t(19) = 4.29, p < 0.001$ ; Figure 4C). These results were  
395 consistent with a previous fMRI study demonstrating successful decoding of retrieved stimulus-  
396 driven memories in early visual cortex following the onset of an associative cue<sup>5</sup>. On the other hand,  
397 although there was no significant difference in right sPCS, there was a significant cluster in right  
398 sPCS in self-generated (Figure 4B) but not in cue-induced imagery (Figure 4A), suggesting that  
399 involvement of sPCS in self-generated imagery started early in the trial and became progressively  
400 larger into late memory delay.

401

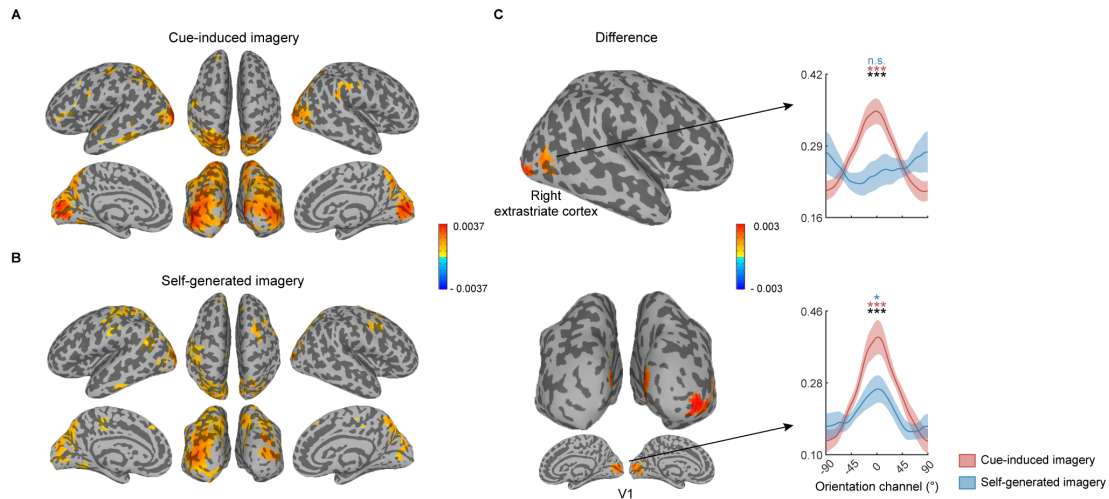

402

403 **Figure 4.** Whole-brain neural representations of imagery contents in middle delay.

404 A. Searchlight parametric map of the strength of orientation representations in middle delay (6-9 s;  
 405 3 s after retrocue) in cue-induced imagery. Colors on the cortical surface denote brain regions with  
 406 significant orientation representations, corrected using a cluster-based permutation method ( $p <$   
 407 0.01). For demonstration purposes, clusters were thresholded at 50 voxels. B. Same as A, but with  
 408 results from self-generated imagery. C. Difference map of orientation representations in A and B,  
 409 with positive values denoting stronger orientation representations in cue-induced imagery.  
 410 Orientation reconstructions obtained from the two significant clusters were shown, both clusters  
 411 showed stronger orientation representations in cue-induced imagery: in right extrastriate cortex,  
 412 only orientation representations in cue-induced imagery were significant:  $t(19) = 4.05, p < 0.001$  in  
 413 cue-induced imagery,  $t(19) = 0.61, p = 0.724$  in self-generated imagery. In V1, orientation  
 414 representations in both conditions were significant,  $t(19) = 4.15, p < 0.001$  in cue-induced imagery,  
 415  $t(19) = 1.86, p = 0.039$  in self-generated imagery. X axis represents distance from response  
 416 orientations, with 0 representing the response orientation of each trial. Y axis represents  
 417 reconstructed orientation channel responses in arbitrary units. Colored asterisks denote significance  
 418 of cue-induced (red) and self-generated (blue) imagery, and black asterisk denotes significance of  
 419 difference between conditions. n.s., not significant, \*:  $p < 0.05$ , \*\*:  $p < 0.01$ , \*\*\*:  $p < 0.001$ .

420

## 421 Discussion

422 Even in the absence of any external stimulation, people can still self-generate contents in visual  
 423 imagery. How would the neural underpinnings of self-generated imagery differ from those of classic  
 424 cue-induced imagery? Here, we investigated (1) the temporal dynamics of self-generated imagery  
 425 in an EEG experiment and (2) the spatial layouts of neural representations in self-generated imagery  
 426 in an fMRI experiment, and contrasted the spatiotemporal dynamics of self-generated imagery with  
 427 those of cue-induced imagery. Our results revealed an enhanced involvement of frontal cortex in  
 428 generating and maintaining contents in self-generated imagery, as evidenced by enhanced neural



429 representations of orientations in sustained potentials in central channels in EEG, and in sPCS of  
430 frontal cortex in fMRI. By contrast, cue-induced imagery was supported by enhanced neural  
431 representations of orientations in alpha-band activity in posterior channels in EEG, and in visual  
432 cortex in fMRI. Taken together, these results jointly support a reverse cortical hierarchy in  
433 representing imagery contents in self-generated versus externally-cued imagery.

434 Previous work on visual imagery has mostly utilized cue-induced paradigms, namely the to-be-  
435 imagined contents were guided by externally presented cues, either from long-term<sup>2-5</sup> or working  
436 memory<sup>6-9</sup>. One advantage of using cue-induced imagery paradigms is that contents of imagery can  
437 be better controlled, compared to uncontrollable situations such as mind wandering. However, real-  
438 life imagery often requires imagery contents to be generated freely of external controls, yet the  
439 neural mechanisms of self-generated imagery have remained largely unexplored due to limitations  
440 in experimental paradigms. Although there have been several recent attempts to tackle on a related  
441 problem<sup>26,27</sup>, it has remained unclear how contents of self-generated imagery were generated and  
442 how self-generated imagery differed from classic cue-induced imagery. To balance the needs for  
443 well-controlled experimental settings as well as for self-generating imagery contents, here we  
444 designed a novel experimental paradigm to investigate the neural mechanism of self-generated  
445 imagery: participants decided freely what to imagine on each trial, with the constraint that imagery  
446 contents were limited to a set of seven pre-learned line orientations. Combining the new behavioral  
447 paradigm with multivariate inverted encoding models allowed us to examine the neural  
448 representations of self-generated imagery contents (orientations in our case), and how these  
449 representations differed from those of cue-induced imagery, beyond univariate activation changes  
450 between conditions. The present study revealed several distinctive features of self-generated  
451 imagery: behaviorally, the vividness of self-generated imagery was significantly reduced compared  
452 to that of cue-induced imagery; neurally, self-generated imagery shared representational codes with  
453 perception as well as with cue-induced imagery in early visual cortex; more interestingly,  
454 converging evidence from EEG and fMRI suggested enhanced orientation representations in frontal  
455 cortex in self-generated compared to cue-induced imagery. We interpreted these representational  
456 differences as reflecting a reverse cortical hierarchy in representing imagery contents that were  
457 generated either via internal drives or external cues. Below we discuss our findings in EEG and  
458 fMRI in more details:

459 According to the reverse visual hierarchy model, imagery signals are initiated in the more anterior  
460 part of cortex such as frontal cortex, and the signals trigger a cascade of neural processing along the  
461 anterior-to-posterior cortical hierarchy<sup>1,17</sup>. Because the initiation signals in self-generated and cue-  
462 induced imagery derived from completely different origins, we hypothesized that anterior cortex  
463 would act differently in self-generated and cue-induced imagery. Our results from both EEG and  
464 fMRI supported this notion: in EEG, we found that imagery contents were decodable in sustained  
465 potentials in central but not in posterior electrodes in both conditions, and more importantly,  
466 orientation representations emerged earlier in time in self-generated imagery, and remained stronger  
467 than those in cue-induced imagery in central electrodes. Due to the poor spatial resolution of EEG  
468 signals, we next turned to fMRI for the neural loci of such representational differences. Consistent  
469 with the EEG findings, we observed that right sPCS of frontal cortex maintained robust orientation  
470 representations of self-generated imagery but not cue-induced imagery, in both middle and late delay  
471 periods. Together, these results indicated anterior cortex, especially right sPCS in the current study,  
472 might serve as the critical neural locus that initiates and maintains contents in self-generated imagery.

473 The results of sPCS in the current study are broadly in line with previous work implicating a role  
474 of sPCS in visual working memory<sup>20-22</sup>. Our results extended this finding to the imagery domain,  
475 and more specifically, we demonstrated that sPCS contributed to self-generated imagery in a way  
476 that was specific to imagined stimuli. Recent debates in the field of working memory have argued  
477 about the specific role of higher-order frontal cortex in working memory maintenance<sup>28,29</sup>, partially  
478 due to the fact that stimulus-specific representations observed in frontal cortex during working  
479 memory were substantially more variable compared to low-level visual cortex. Our finding added  
480 new insights into this line of research, by demonstrating that stimulus-specific representations in  
481 frontal cortex were enhanced when the level of “internality” increased as in self-generated imagery.  
482 In other words, our work clearly indicated the origin of stimulus-specific representations in sPCS  
483 was internal rather than external. Moreover, we demonstrated significant functional coupling  
484 between stimulus-specific representations in sPCS and those in EVC in self-generated imagery, in  
485 support of the view that sPCS exerts top-down control over lower-level visual cortex<sup>30,31</sup>.  
486 Intriguingly, in another recent work from our lab (unpublished), we have identified a similar reverse  
487 hierarchy between EVC and IPS, for cue-induced imagery as compared to perception. The fact that  
488 the top node of the reverse hierarchy moved more anteriorly from IPS to sPCS, when imagery

489 contents became more “internally-generated”, possibly implied a flexible reverse hierarchy that  
490 depends on the “internality” of the specific cognitive process. Last but not least, it should be noted  
491 that the function of sPCS can be better understood when taking into account the type of imagined  
492 stimuli used in the current study. sPCS shows robust stimulus representations for spatial or space-  
493 related stimuli such as locations and orientations <sup>20-22</sup>, but less so for non-spatial stimuli such as  
494 colors <sup>21,32</sup>. Whether there remains a more domain-general, stimulus-nonspecific brain region in  
495 self-generated imagery requires further future work to elaborate on.

496 Turning to lower-level visual cortex, imagery and perception have been shown to share neural  
497 codes in early visual cortex <sup>8,33</sup>. Relatedly, a recent EEG experiment found imagery and perception  
498 shared neural representations in alpha-band oscillatory activity in posterior electrodes <sup>4</sup>. In our EEG  
499 experiment, although we failed to find orientation representations from sustained potentials in  
500 posterior electrodes, we found imagery contents were indeed represented in alpha-band oscillatory  
501 activity in posterior electrodes. Interestingly, orientation representations in alpha-band activity  
502 demonstrated a reversed pattern from those in sustained potentials, and orientation representations  
503 were stronger in cue-induced imagery rather than in self-generated imagery. Our fMRI searchlight  
504 also demonstrated an analogous pattern that first emerged in V1 and moved onto extrastriate cortex  
505 in late delay, and orientation representations of both self-generated and cue-induced imagery shared  
506 common neural codes with perception in visual cortex. Moreover, the emergence of orientation  
507 representations in posterior electrodes was much later in time, compared to those in central  
508 electrodes in sustained potentials. Given that alpha-band oscillations carry feedback information <sup>34-</sup>  
509 <sup>36</sup>, it was likely that the orientation representations in alpha-band received feedback modulations  
510 from higher-order areas, possibly frontal cortex.

511 How should we interpret the reversed patterns of results in alpha-band activity in EEG as well as  
512 in visual cortex in fMRI? We noticed that this neural result echoed the behavioral difference in  
513 vividness, that is, imagery experience was reported to be more vivid in cue-induced imagery than  
514 in self-generated imagery. One explanation for the reduced representational strength in self-  
515 generated imagery would be attenuated sensory processing for self-generated imagery, similar as  
516 self-generated sensations that felt less salient than externally generated sensations <sup>37-39</sup>, and as other  
517 higher-level self-generated cognitive processes such as motor imagery, inner speech, and  
518 numerosity estimation <sup>40-42</sup>. Attenuation in self-generated imagery can be accommodated within the

519 internal feedforward model framework<sup>43</sup>. This model proposes any action people take is followed  
520 by a corollary discharge, which is used to predict sensory consequences of the action. When the  
521 prediction matches the actual sensory feedback, the sensory consequences are attenuated. In self-  
522 generated imagery, the prediction of imagery was always in line with self-generated contents, thus  
523 leading to weaker neural representations in sensory cortex. Consequently, the reduction in subjective  
524 experience of imagery might derive from this representational attenuation.

525 Alternatively, these results could be accounted for by the sensorimotor recruitment hypothesis,  
526 which proposes that visual cortex is engaged in both perceiving external stimuli and maintaining  
527 mental images<sup>44</sup>, with shared representations between perception and working memory<sup>45</sup>, between  
528 long-term memory and perception<sup>5</sup>, and between long-term memory and working memory<sup>46</sup>. In  
529 these studies, significant neural representations of contents in long-term memory in early visual  
530 cortex can be explained by a neural reinstatement of the to-be-retrieved information from long-term  
531 memory, with the hippocampus possibly acting as the source of the modulatory signals<sup>5</sup>. Because  
532 both of the imagery tasks in our current study engaged retrieval from long-term memory, it was  
533 possible that the associative cue in cue-induced imagery facilitated memory retrieval and resulted  
534 in a stronger reinstatement of imagined contents. It should be noted that the sensory attenuation and  
535 sensorimotor recruitment accounts are not mutually exclusive, and might simultaneously contribute  
536 to the current results.

537 It is noteworthy that in our EEG experiment, distinct result patterns were observed in sustained  
538 potentials and oscillatory activity: first, orientation representations were observed in central  
539 electrodes in sustained potentials, and in posterior electrodes in alpha-band activity; second, the  
540 differences in representational strength between self-generated and cue-induced imagery were  
541 reversed, with self-generated imagery demonstrating better orientation representation in central  
542 electrodes in sustained potentials, and the opposite was true in posterior electrodes in alpha-band  
543 activity in cue-induced imagery. While these results might seem difficult to explain at first glance,  
544 we would like to point out that several recent studies have also reported distinct cognitive processes  
545 carried by sustained potentials and oscillatory activity. For example, one study has found that  
546 sustained potentials encoded contents in working memory, whereas alpha-band activity mainly  
547 encoded spatial attention<sup>24</sup>. However, in a different memory paradigm, unattended items in working  
548 memory could be decoded from alpha-band activity but not from sustained potentials<sup>25,47</sup>. We think

549 these results would be difficult to reconcile, without a systematic examination on the effects of the  
550 two types of EEG activity along with careful experimental designs; yet, we speculated that  
551 narrowing down the focus to alpha-band activity by applying wavelet transformation to sustained  
552 potentials might filter out orientation-irrelevant signals and noise in other frequency bands, thereby  
553 increasing the signal-noise ratio (SNR) of orientation representations in posterior electrodes. By  
554 contrast, imagery-relevant signals in central electrodes might rely primarily on slow-wave cortical  
555 dynamics<sup>48</sup>, because the pattern of enhanced self-generated representations was not observed in  
556 any single frequency band of oscillatory activity in central electrodes. It would be interesting for  
557 future studies to examine whether the observed functional differences of frontocentral sustained  
558 potentials and posterior alpha-band activity would generalize to other cognitive processes.

559 We have discussed several distinct features of self-generated imagery by comparing it with cue-  
560 induced imagery; yet, there remain a few other interesting observations from the current study that  
561 require further work to look into. For instance, we noticed that the majority of differences between  
562 cue-induced and self-generated imagery was cortically right lateralized. Moreover, in terms of the  
563 involvement of frontal cortex, there was a hint that self-generated imagery was right lateralized, and  
564 cue-induced imagery was left lateralized. Whether this differential patterns in cortical lateralization  
565 speaks to difference between different types of imagery remains to be further investigated<sup>49</sup>. In  
566 addition, although we removed any potential response bias from the model training stage to avoid  
567 overfitting, it would be interesting to investigate whether the two types of imagery are influenced  
568 by different cognitive factors and thereby resulting in differential response bias patterns, such as the  
569 oblique and attractor biases typically observed in working memory<sup>50,51</sup>.

570 In conclusion, using both EEG and fMRI, we revealed distinctive spatiotemporal neural dynamics  
571 underlying the neural basis of self-generated imagery: compared to cue-induced imagery, self-  
572 generated imagery was supported by an enhanced involvement of frontal cortex, as indexed by better  
573 imagery representations in sustained potentials in central channels of EEG and in sPCS of frontal  
574 cortex in fMRI. The enhancement in frontal representations was accompanied by a decrease in  
575 orientation representations in visual cortex, which might reflect the attenuated subjective experience  
576 in vividness at the behavioral level. Research on self-generated imagery may have abundant  
577 potential uses. People who suffer from schizophrenia might either have delusions that have no basis  
578 in reality or generate hallucinations whose contents do not actually exist. Our results provide new

579 insights into the neural mechanisms of visual imagery, and may open up a new avenue for both  
580 experimental and clinical research on imagery.

581

## 582 **Methods**

### 583 **Participants**

584 A total of forty-nine volunteers participated in the study, two of whom participated in both  
585 experiments. All participants had normal or corrected-to-normal vision, reported having no  
586 psychiatric or neurological disorders, provided written informed consent, and reported normal visual  
587 imagery ability assessed by the Vividness of Visual Imagery Questionnaire (VVIQ) <sup>52</sup>. All  
588 participants were recruited at Shanghai Institutes for Biological Sciences, Chinese Academy of  
589 Sciences, and were monetarily compensated for their participation. The study was approved by the  
590 ethical committee of Center for Excellence in Brain Science and Intelligence Technology, Chinese  
591 Academy of Sciences (CEBSIT-2020028).

592 Twenty-eight volunteers participated in Experiment 1 (EEG experiment). Four participants were  
593 excluded: two participants had insufficient data due to technical issues, one participant failed to  
594 follow instructions, and one participant dropped out from the experiment, leaving twenty-four  
595 participants in the final sample for Experiment 1 (13 females, 11 males; mean age = 24.1, SD = 2.3).

596 Twenty-three volunteers took part in Experiment 2 (fMRI experiment), all were eligible for MRI  
597 scans. Three participants were excluded: two participants had insufficient data due to technical  
598 issues, one participant failed to follow instructions, leaving twenty participants in the final sample  
599 for Experiment 2 (11 females, 9 males; mean age = 23.6, SD = 2.3). We did not estimate sample  
600 sizes for Experiment 1 or 2 a priori, but the sample size used in both experiments were comparable  
601 to those in previous studies with similar approaches.

602

### 603 **Stimuli & Apparatus**

604 Two sets of non-semantic kaleidoscope images were used, each consisted of seven images. All of  
605 them were generated by Python2 codes used in a previous study <sup>53</sup>. Each kaleidoscope was created  
606 by overlaying three transformed hexagons. Each hexagon had a unique color and was transformed  
607 by four rounds of side deflection at a random direction. The RGB values of colors were [(220,20,60),  
608 (70,130,180), (255,140,0)] in one set and [(50,205,50), (139,0,139), (205,155,29)] in the other set.

609 In Experiment 1, stimuli were presented with MATLAB (R2018b, The MathWorks) and  
610 Psychtoolbox 3 extensions<sup>54,55</sup>. They were displayed on a 48×27 cm HIKVISION LCD screen with  
611 a 60 Hz refresh rate and a 1920 × 1080 resolution. The viewing distance was 62 cm. While  
612 performing the task, participants' head position was stabilized by a chin rest. Responses were  
613 recorded with a keyboard and a mouse.

614 In Experiment 2, All stimuli were presented using MATLAB (R2012b, The MathWorks) and  
615 Psychtoolbox 3 extensions on an SINORAD LCD projector (1280 × 1024 resolution; 60 Hz refresh  
616 rate). Participants viewed stimuli through a coil-mounted mirror in the scanner at a viewing distance  
617 of 90.5 cm. Responses were made via two SINORAD two-key button boxes.

618

## 619 **Experimental paradigm and procedure**

### 620 **Overview**

621 The purpose of the current study was to unveil the spatiotemporal neural dynamics of self-  
622 generated imagery, by contrasting with those of cue-induced imagery. In both conditions, we  
623 presented kaleidoscope images instead of the actual to-be-imagined stimuli, in order to minimize  
624 the influence of stimulus-driven activity in neural signals. In cue-induced imagery, imagery content  
625 was determined by an external cue. Seven kaleidoscope images were used, each associated with a  
626 specific line orientation. Participants were required to imagine a line with the orientation indicated  
627 by the kaleidoscope image. To further eliminate stimulus-driven activity from the kaleidoscope  
628 images, we adopted a retrocue imagery paradigm. On each trial, participants were presented with  
629 two kaleidoscope images followed by a retrocue. The retrocue indicated the specific kaleidoscope  
630 image with which the associated orientation should be imagined. In self-generated imagery, the  
631 imagery content was determined by participants volitionally. Participants needed to generate their  
632 imagery content on their own by freely choosing one from the seven learned orientations on each  
633 trial. To match the trial time course of the cue-induced imagery, seven different kaleidoscope images  
634 and a retrocue design were also used, but the kaleidoscopes were not associated with orientations.  
635 The experimental paradigm was depicted in Figure 1. The specific set of kaleidoscope images used  
636 for each condition was counterbalanced across participants. The specific association between each  
637 kaleidoscope image and each orientation was also randomized across participants.

638 Another goal of the current study was to obtain trialwise objective and subjective measures of

639 imagery. At the end of each trial, participants were required to report their imagery content  
640 (orientation) and subjective vividness. In Experiment 2, due to time limitations, we used 1-4 point  
641 of vividness rating for assessing subjective vividness as used in previous studies<sup>56</sup>. However, the  
642 standard measurement of vividness such as 1-4 point rating conflated lots of different factors of  
643 subjective experience, such as subjective specificity and subjective intensity<sup>57</sup>. As such, to uncover  
644 specific subjective experience in different dimensions, in Experiment 1 the vividness was  
645 decomposed into two different dimensions: precision and intensity. Precision represented the  
646 confidence in the precision of orientation report, whereas intensity indicated the subjective strength  
647 of imagery content.

648

### 649 **Behavioral learning session**

650 Prior to the main experimental session, participants first learned the associations between seven  
651 kaleidoscope images and seven specific orientations (spanning the entire orientation space and were  
652 equally distant: 15°, 40.71°, 66.43°, 92.14°, 117.86°, 143.57°, 169.29°). On each trial, participants  
653 passively viewed one kaleidoscope image followed by its associated line orientation. The  
654 kaleidoscope image was presented for 0.9 s and then the line was shown for 0.5 s, with an inter-  
655 stimulus-interval (ISI) of 0.2 s in between, followed by an inter-trial-interval (ITI) of 1.2 s. Each  
656 learning block consisted of all seven association pairs presented in a randomized order. At the end  
657 of each block, participants could decide whether to perform a test on their learned associations or to  
658 continue with learning. Each trial started with a fixation period of 0.5 s, and then a kaleidoscope  
659 image was presented for 0.4 s. After a 2-s delay, participants were required to report the  
660 corresponding orientation on an orientation wheel as precisely as possible in 2.5 s. A feedback  
661 message would be presented for 0.3 s, indicating whether the response was accurate (error < 5°) or  
662 inaccurate (error ≥ 5°). After an interval of 0.2 s, the line with the correct orientation would be  
663 shown for 0.5 s to consolidate memory. ITI varied in 0.8-1.3 s. The test phase consisted of 28 trials.  
664 The radius of the line in both learning and testing phases varied between 3.2-4.8° on a trial-by-trial  
665 basis. Participants underwent the aforementioned procedure iteratively until the mean absolute error  
666 during test fell below 10°.

667

### 668 **Experiment 1**



669 In Experiment 1 (the EEG experiment), each trial started with the successive presentation of two  
670 kaleidoscope images at the center of the screen ( $3.65^\circ \times 3.65^\circ$  in size), each for 0.35 s with an ISI of  
671 0.2 s. After 0.2 s, a retrocue followed for 0.2 s indicating which of the two stimuli should be used  
672 for imagery. If images had no associations (self-generated imagery), participants needed to freely  
673 choose one from seven learned orientations and imagine a line with the chosen orientation at the  
674 center of the screen; if images were associated with orientations (cue-induced imagery), participants  
675 needed to imagine the line at the orientation associated with the cued kaleidoscope image. After a  
676 delay period of 2 s, during which participants needed to keep actively imagining the orientation,  
677 participants were required to report the orientation, precision and intensity of their imagined line on  
678 an orientation wheel in 5.5 s. The orientation wheel consisted of a circle with a radius of  $5^\circ$ , a needle  
679 crossing the fixation point with the same radius, and a bowtie-shaped wedge centered on the needle.  
680 The orientation of the needle represented the orientation of the imagined line, which was adjusted  
681 by changing the position of the mouse cursor. The angle of wedge represented precision, which was  
682 adjusted by changing the distance of cursor to the fixation. The color of the wedge indicated intensity,  
683 which was adjusted by two buttons (increase or decrease) on a keyboard. The initial values of  
684 orientation, angle and color were randomly chosen and participants could move the cursor and press  
685 keyboard to report three variates simultaneously. Only when both operations of mouse and keyboard  
686 were finished would the trial end. ITI varied in 0.8-1.3 s. The cued kaleidoscope, cued order (first  
687 versus second), and condition were fully counterbalanced across blocks.

688 In each block, there were three catch trials to keep participants' attention on kaleidoscope images  
689 before delay. The catch trial had the same time course as the main task trial, except that it required  
690 participants to choose the cued kaleidoscope from two probe images after retrocue in 3 s. catch trial  
691 ITIs were fixed at 1.05 s. At the end of each block, participants received feedback on main task  
692 performance and catch trial performance. Taking account of catch trials, there were 45 trials per  
693 block. All participants needed to complete 20 blocks in Experiment 1. In total, participants  
694 performed 420 trials per condition. Seven participants performed the task without catch trials.

695

## 696 **Experiment 2**

### 697 **Imagery task**

698 The procedure of Experiment 2 was similar to that of Experiment 1, except that the timing of

699 events and responses were adjusted for fMRI. Participants were shown two kaleidoscope images  
700 ( $3.26^\circ \times 3.26^\circ$  in size) successively, each in a 0.8-s stimulus window with a 0.4-s ISI. Then a retrocue  
701 was presented for 0.6 s. During the delay period, participants imagined a line for 9 s. During the  
702 response period, participants needed to rotate the needle of orientation wheel (radius =  $3.7^\circ$ ) to  
703 match the orientation of imagined line within 3.75 s and then rated their experienced vividness on a  
704 scale from 1 to 4 points in 1.25 s, where 1 represented lowest vividness and 4 represented highest  
705 vividness. The ITI varied in 2.5 s, 4 s, 5.5 s and 7 s. Task performance and the number of missing  
706 vividness reports were provided at the end of each block as feedback. There were 16 main task trials  
707 and one catch trial per block. The response time for catch trials was 3 s, and catch trial ITIs were  
708 fixed at 4.5 s. Each participant completed 14 blocks in total, resulting in 112 trials per condition.  
709 Three participants performed the task without catch trials.

#### 710 **Perception task**

711 Because no physical orientations were present throughout the imagery task, in order to obtain  
712 participants' neural responses to ground-truth, sensory orientations, participants completed three  
713 additional blocks of perception task following the imagery task. On each trial, an oriented line whose  
714 orientation was randomly chosen from seven specific orientations flickered at the center of the  
715 screen for 4.5 s at a frequency of about 1.8 Hz. The radius of the line randomly varied between 3.2-  
716  $4.8^\circ$  on a trial-by-trial basis. The ITI varied in 3 s, 4.5 s and 6 s. Participants were instructed to fixate  
717 at the white fixation point and press a corresponding button whenever the fixation point turned green.  
718 Each perception block consisted of 30 trials, and participants completed 90 trials in total.

719

#### 720 **EEG recording and preprocessing**

721 EEG data were acquired using a Brain Products ActiCHamp recording system and BrainVision  
722 Recorder (Brain Products GmbH, Gilching, Germany). Scalp voltage was obtained from a broad set  
723 of 59 electrodes at 1000 Hz (FCz as reference). Vertical and horizontal EOG were recorded from 2  
724 electrodes located  $\sim 2$  cm above and below the right eye, and from 2 electrodes  $\sim 1.5$  cm lateral to  
725 the external canthi, respectively. Electrode impedance was kept below 30 k $\Omega$ .

726 Preprocessing analyses were performed in MATLAB (R2021a, The MathWorks) using EEGLAB  
727 Toolbox<sup>58</sup>. The raw EEG signals were resampled at 250 Hz. Then the data were band-pass filtered  
728 between 0.01 and 45 Hz. Epochs were segmented from -0.5 s to +3.6 s relative to the onset of the

729 first stimulus. The signals were baseline corrected from -0.2 s to 0 s. The epoched data were visually  
730 inspected and those containing large muscle, cardiac and respiratory artifacts (except for eye blinks)  
731 or extreme voltage offsets were manually removed. Independent component analysis (ICA) was  
732 then performed using EEGLAB's binica algorithm for each subject to identify and remove  
733 components that were associated with eye blinks<sup>59</sup> and eye movements<sup>60</sup>. Data after ICA were  
734 treated as the preprocessed voltage data. To estimate oscillatory power across time and frequencies,  
735 the voltage data from each channel and trial were convolved with a family of complex Morlet  
736 wavelets spanning 3–45 Hz in 1 Hz steps with wavelet cycles increasing linearly between 3 and 10  
737 cycles as a function of frequency. The power was calculated as the percent change of squared  
738 absolute value in the resulting complex time series relative to the baseline between -0.2 s and 0 s.

739

#### 740 **fMRI acquisition and fMRI data preprocessing**

741 MRI data were recorded using a Siemens Tim Trio 3.0 T scanner (Erlangen, Germany) with a  
742 standard 32-channel phased-array head coil at the Center for Excellence in Brain Science and  
743 Intelligence Technology, Chinese Academy of Sciences. Functional images were acquired with a  
744 gradient echo echoplanar pulse sequence with a multiband acceleration factor of 2 (TR/TE =  
745 1500/30 ms; flip angle = 60°; matrix = 74 × 74; 46 slices; voxel size = 3 mm isotropic). T1-weighted  
746 anatomic images were collected using the Magnetization Prepared Rapid Acquisition Gradient Echo  
747 (MPRAGE) pulse sequence (TR/TE = 2300/2.98 ms; flip angle = 9°; matrix = 256 × 256; 192 slices;  
748 voxel size = 1 mm isotropic).

749 Preprocessing of MRI data was performed using AFNI<sup>61</sup>. The first five volumes of each  
750 functional run were removed. The EPI data were then registered to the last volume of each scan  
751 session and then to the T1 volume of the same session. Six nuisance regressors were included in  
752 GLMs to account for head motion artifacts in six different directions. The data were then motion  
753 corrected, detrended (linear, quadratic, cubic), and z-score normalized within each run.

754

#### 755 **Quantification and statistical analyses**

##### 756 **Behavioral data analyses**

757 In both Experiments 1 and 2, the behavioral performance of imagery could be quantified by errors  
758 of the responses relative to the ground-truth orientations. In cue-induced imagery, error was

759 calculated as the circular distance between the cued and response orientations, which we referred as  
760 the absolute error. In self-generated imagery, because there were no sample orientations in self-  
761 generated imagery, errors in this condition were quantified by calculating the circular distance of  
762 response orientations to all the seven learned orientations, and choosing the smallest error among  
763 all as the relative error. As a comparison, relative errors were also computed for cue-induced imagery.

764 For vividness measurements, in Experiment 1, precision was quantified by the angle of response  
765 wedge (ranging from  $2^\circ$  to  $180^\circ$ ), of which the smaller angle represented smaller uncertainty of the  
766 orientation of imagined line. Intensity was quantified by the grayscale value of response wedge  
767 (ranging from 0 to 0.5; 0 = black, 0.5 = background color). Smaller values represented a more  
768 intensive imagery experience. Thus, the smaller the values of precision and intensity, the more vivid  
769 the subjective experience. In Experiment 2, the vividness rating score represented the level of  
770 vividness, the larger the vividness score, the more vivid the subjective experience.

771 For each participant, means of error, precision, intensity or vividness rating in each condition  
772 were calculated. We conducted two-tailed paired t tests to test the significance of the mean difference  
773 between conditions. Pearson correlations were performed between precision, intensity and error to  
774 assess their potential correlational relationships.

775 We took several approaches to assess whether there existed any systematic biases in participants'  
776 responses. First, we examined the uniformity of response distributions in two conditions. All  
777 responses were binned into seven bins, with each of the seven learned orientations as bin centers.  
778 Differences in distributions were statistically assessed using  $\chi^2$  tests. Second, we examined whether  
779 the initial orientation had a systematic influence on response, by calculating the circular distance  
780 between the initial orientation and final response orientation. Differences between bins were  
781 statistically assessed using two-tailed paired t tests.

782

## 783 **Inverted encoding model (IEM)**

### 784 *Overview*

785 All IEM analyses were performed in MATLAB using custom codes. The inverted encoding model  
786 assumed that the signals in each unit (e.g., voltage or power in each electrode in EEG, or BOLD  
787 signal in each voxel in fMRI) reflected the weighted sum of a small number of hypothesized feature  
788 tuning channels (i.e., neuronal populations), each tuned for a different feature (i.e., orientation in

789 the current study). In our experiments, the number of hypothesized orientation tuning channels was  
790 set to five (36° apart, equally spaced). We modeled the response profile of each channel to a specific  
791 orientation  $\theta$  as a half sinusoid raised to the 8th power (FWHM = 0.82 rad):

$$792 \quad R = \cos(\theta - c)^8$$

793 where  $c$  was the center of the channel. Since there were no correct targets in self-generated  
794 imagery, we took response orientations (round to the nearest integer) in both conditions as  $\theta$  to  
795 obtain the idealized responses from basis functions, which meant the  $\theta$  was possible in the 1-180°  
796 orientation space.

797 The IEM analysis proceeded in two stages, encoding (training) and decoding (test). We  
798 partitioned our data into independent sets of training data and test data. In the encoding stage, the  
799 hypothesized channel responses ( $C_1$ ,  $k \times n$ ,  $k$ : the number of channels;  $n$ : the number of trials) were  
800 projected to actual measured signals in training dataset ( $B_1$ ,  $m \times n$ ,  $m$ : the number of units) according  
801 to an unknown weight matrix ( $W$ ,  $m \times k$ ), which could be described a general linear model of the  
802 following form:

$$803 \quad B_1 = WC_1$$

804 The weight matrix ( $\hat{W}$ ) was obtained via least-squares estimation as follows:

$$805 \quad \hat{W} = B_1 C_1^T (C_1 C_1^T)^{-1}$$

806 In decoding stage, the model was inverted to transform the independent test dataset ( $B_2$ ,  $m \times t$ ,  $t$ :  
807 the number of trials) into estimated channel responses ( $C_2$ ,  $k \times t$ ) by the obtained weight matrix:

$$808 \quad \hat{C}_2 = (\hat{W}^T \hat{W})^{-1} \hat{W}^T B_2$$

809 Following the IEM analysis in previous studies<sup>27,62</sup>, the channel centers were not fixed but shifted  
810 from 0°, 36°, 72°, 108°, 144° to 35°, 71°, 107°, 143°, 179° in 1° step for 36 iterations. We conducted  
811 the above analysis in each iteration, such that all 180 orientations from 1° to 180° served as channel  
812 centers. All of estimated channel responses from all iterations were combined to create responses of  
813 180 orientation channels. The result, for any given orientation, can be considered a reconstruction  
814 of the model's estimate of the neural representation of that orientation. This procedure ensured that  
815 our reconstructions were not biased by any specific channel centers. The reconstruction of channel  
816 responses was shifted to a common center (90° on x axis).

817 To characterize the strength of reconstructions, we folded the channel responses on both sides of  
818 the common center, averaged them, fitted with linear regression, and then took the resulting slope

819 of linear regression as an index of the strength of reconstructions.

820

821 ***IEM procedure with all and balanced data***

822 To reveal orientation-specific neural representations of imagery in both conditions, we used  
823 participants' response on each trial as the target label, and used data combined from both conditions  
824 for training and testing IEMs. This mixed IEM was supposed to provide an unbiased way of making  
825 comparisons between conditions<sup>63</sup>. To achieve this, we used a k-fold cross-validation procedure.  
826 For each participant, all data from both conditions were divided into four folds. In each iteration, all  
827 but one folds served as the training data, and the left-out fold served as the testing data. The  
828 procedure iterated until all folds had served as training and testing data, and results from all  
829 iterations were averaged, for each condition separately.

830 However, one potential drawback with the approach was that participants' responses were often  
831 unbalanced across different response bins. This imbalance in trial number between response bins  
832 might result in overfitting of IEM, such that orientation reconstructions from IEM might be  
833 overestimated. To avoid this, we balanced trials in a way that the trial number in each of the seven  
834 bins would be made equal. To be specific, we randomly drew a certain number of trials from each  
835 bin, and the number of trials drawn was determined by the bin with the smallest number of trials  
836 among the seven bins. This initial step would result in matched numbers of trials across bins, but  
837 not necessarily between conditions. To further balance trials between conditions, we rebalanced the  
838 trials by randomly removing one trial from a certain bin of the condition with more trials; and in the  
839 meantime, including one trial from the same bin of the condition with fewer trials, this step was  
840 iterated until the difference of trial numbers between conditions was below two. To make full use  
841 of all data, the balancing and cross-validation procedures were repeated for 50 times, and the results  
842 were averaged across repetitions.

843

844 ***IEM analyses with EEG***

845 In EEG experiment, 59 electrodes were divided into 3 subsets of electrodes (frontal electrodes:  
846 FP1, FP2, AFz3, AFz4, AFz7, AFz8, Fz1, Fz2, Fz3, Fz4, Fz5, Fz6, Fz7, Fz8; central electrodes: FC1,  
847 FC2, FC3, FC4, FC5, FC6, FT7, FT8, Cz1, Cz2, Cz3, Cz4, Cz5, Cz6, T7, T8, CPz1, CPz2, CPz3,  
848 CPz4, CPz5, CPz6, TP7, TP8; posterior electrodes: Pz1, Pz2, Pz3, Pz4, Pz5, Pz6, Pz7, Pz8, POz3,

849 POz4, POz7, POz8, Oz1, Oz2). We applied IEM to voltage signals from all electrodes, frontal  
850 electrodes, central electrodes and posterior electrodes separately. After time-frequency  
851 decomposition of voltage data, the obtained power signals were averaged within alpha-band (8-12  
852 Hz). Similarly, we performed IEM analyses on alpha-band power data, separately in global  
853 electrodes and local subsets. For both voltage and power data, after balancing trials, IEM analysis  
854 was performed at each time point with a sliding window of 3 time points to obtain time-resolved  
855 orientation reconstructions. For IEM analyses on all frequencies, a similar procedure was conducted  
856 on power data of every single frequency ranging from 3 to 45 Hz.

857

### 858 *IEM analyses with fMRI (Searchlight of IEM)*

859 In Experiment 2, the IEM was combined with a roving “searchlight” procedure<sup>20,64</sup>, which  
860 allowed us to reconstruct and quantify representations of imagined orientations across the entire  
861 brain. For each participant, their data in the original space were warped to the MNI template<sup>65</sup>. We  
862 used the “sphere\_searchlight” class in PyMVPA toolbox<sup>66</sup> to perform the searchlight analysis. We  
863 defined a spherical searchlight (radius = 9 mm) centered on each voxel of the whole-brain gray  
864 matter mask. Considering a typical hemodynamic response lag of 4-6 s, we extracted and averaged  
865 the BOLD responses in each voxel over a time period spanning 6-9 s (middle delay) and another  
866 spanning 9-12 s (late delay) following the onset of stimulus, and performed IEM searchlight within  
867 each time period. IEM analysis was performed using the data with all trials and balanced trials to  
868 calculate the slope maps separately. Results from whole-brain searchlight were displayed on the  
869 cortical surface reconstructed with FreeSurfer<sup>67,68</sup> and visualized with SUMA in AFNI.

870 Because no physical lines were present during the imagery task, to compare the neural  
871 representation of imagery with that of perception, we performed a cross-task generalization IEM  
872 analysis, by training the IEM on perception data, and testing the IEM on imagery data. We extracted  
873 and averaged the responses in each voxel over a time period spanning 4.5-7.5 s of each trial of the  
874 perception task to train the IEM searchlight, and tested the model on the late delay data (9-12 s) of  
875 the imagery task. We did not balance trials for this analysis because samples in our perception task  
876 were already balanced.

877 Note that the total trial number in each condition was smaller in Experiment 2 than in Experiment  
878 1 due to prolonged trial length in fMRI studies. To avoid false positive results from an insufficient

879 number of trials, we conducted the searchlight with trial balancing and without trial balancing (i.e.,  
880 using all trials), and took the intersection of these two statistical parametric maps as the final result  
881 of the searchlight analyses in Experiment 2.

882

### 883 **Cluster-based multiple comparisons correction**

884 We used cluster-based permutation to correct for multiple comparisons across time points (in  
885 EEG) and voxels (in fMRI). The overarching principle for cluster-based permutation is depicted as  
886 below: all to-be-corrected test statistics were clustered in connected sets on the basis of temporal,  
887 spatial, or spatiotemporal adjacency to form contiguous clusters. Cluster-level test statistics were  
888 calculated by taking the sum of the test statistics within every cluster. The test statistics were then  
889 permuted, and the cluster-level test statistic of the largest cluster was taken from the permuted data.  
890 This procedure was repeated 10000 times to create a null distribution of test statistics. The  
891 proportion of each cluster-level test statistic in true data being smaller than the cluster-level null  
892 distribution was calculated as the p-value of the corresponding cluster.

893 For analyses on voltage and alpha-band data of EEG, the IEM slopes from 24 participants in each  
894 condition and their paired difference between conditions were compared against zero using paired  
895 or one-sample t-test to obtain the one-tailed significance ( $\alpha = 0.05$ ) at each time point. To obtain the  
896 null distribution for multiple comparisons correction, the slopes at each time point were randomly  
897 multiplied by either 1 or -1 independently, and then performed one-tailed t-test across participants.  
898 This procedure was repeated 10000 times, creating a null distribution of the t statistics. The  
899 contiguous t statistics clusters of true data and the null distribution underwent multiple comparisons  
900 correction to threshold ( $\alpha = 0.01$ ) significant time points. For analyses on all frequency data of EEG,  
901 a similar procedure was conducted on 2D time-frequency clusters.

902 For fMRI data, t-tests for the whole-brain slope map in each condition and their difference against  
903 zero were performed using the AFNI function “3dttest++”. To reduce the computational load in  
904 permutation, we performed a two-stage procedure<sup>69</sup>. The randomized sign-flip procedure described  
905 above was first repeated 100 times for each participant. In a second step, the randomized samples  
906 were bootstrapped from each participant and then performed one-tailed t-test ( $\alpha = 0.05$ ) across  
907 participants to obtain a map of t statistics. The second step was repeated 10000 times to create the  
908 null distribution. The contiguous t statistics clusters of true slope maps and the null distribution



909 underwent multiple comparisons correction and the obtained  $p$ -values were further corrected using  
910 Family-wise Error Rate (FWE) method using a threshold of  $\alpha = 0.01$ .

911

### 912 **Classification using Support vector machine**

913 In order to examine whether our main results would hold with a different approach for revealing  
914 orientation representations, we decoded imagery content using multi-class classification with a  
915 linear support vector machine (SVM) approach. We first labeled the responses according to which  
916 of the seven bins the responses belonged to. Then the trial number in each bin were balanced using  
917 the method mentioned above and a  $k$ -fold ( $k = 4$ ) cross-validation procedure was applied to the data  
918 with balanced trials. Like the IEM analysis with balanced trials, the SVM decoding was also  
919 repeated 50 times and the results from each iteration were averaged. We used the “fitcecoc()”  
920 function with standard linear SVM classifier as the learner to decode the EEG data.

921

922 **Supplementary Figures**

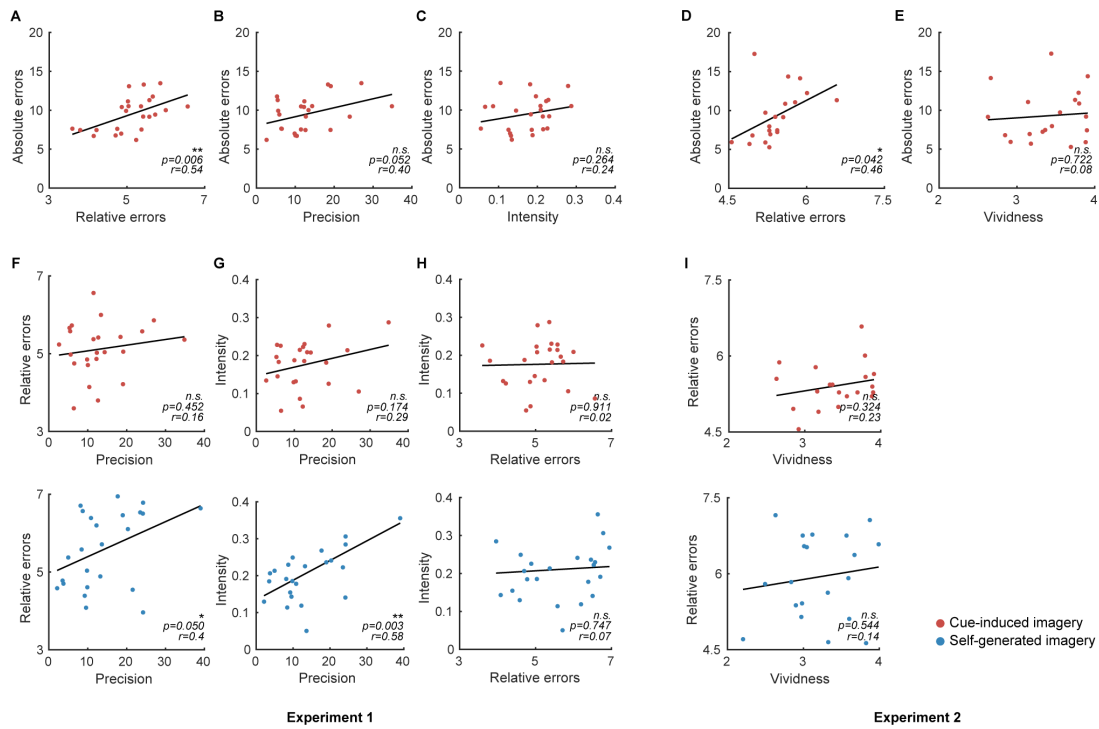

923

924 **Figure S1.** Correlations between behavioral measurements across participants.

925 A. Relative errors positively correlated with absolute errors in cue-induced imagery in Experiment  
 926 1. Each dot represented individual participant. Relative errors (x axis) and absolute errors (y axis)  
 927 were averaged across trials for each participant. Black lines represented the best linear fit. B. Similar  
 928 as A, but with correlations between precision and absolute errors in Experiment 1. C. Similar as A,  
 929 but with correlations between intensity and absolute errors in Experiment 1. D. Same as A, but with  
 930 results from Experiment 2. E. Similar as A, but with correlations between vividness and absolute  
 931 errors in Experiment 2. F. Similar as A, but with correlations between precision and relative errors  
 932 in Experiment 1. G. Similar as A, but with correlations between precision and intensity in  
 933 Experiment 1. H. Similar as A, but with correlations between relative errors and intensity in  
 934 Experiment 1. I. Similar as A, but with correlations between vividness and relative errors in  
 935 Experiment 2. Red and blue dots represent cue-induced and self-generated imagery, respectively.  
 936 Asterisks denote significance of correlations, n.s., not significant, \*:  $p < 0.05$ , \*\*:  $p < 0.01$ , \*\*\*:  $p$   
 937  $< 0.001$ .

938

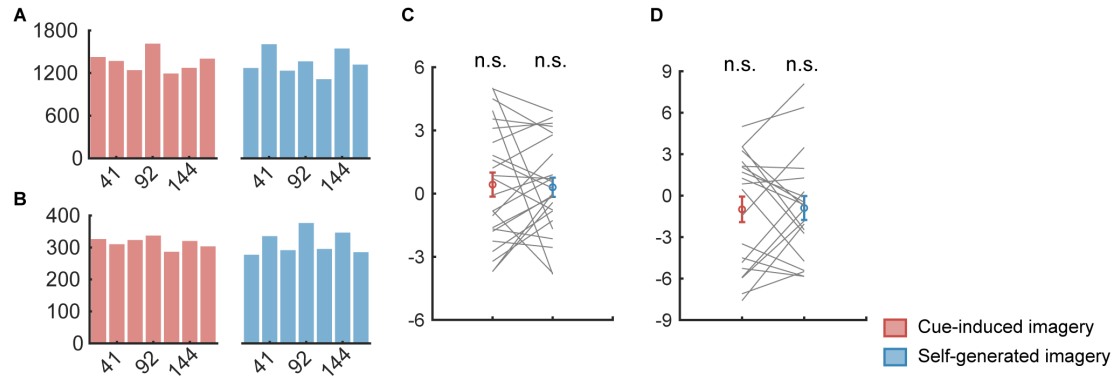

939

940 **Figure S2.** Evaluation of response biases.

941 A. Histograms of response distributions, pooled from all participants in Experiment 1. x axis

942 represents orientation bins, centered on the seven learned orientations, y axis represents frequency.

943 Red and blue bars represent cue-induced and self-generated imagery, respectively. The uniformity

944 of distribution was assessed using  $\chi^2$  tests: cue-induced imagery:  $\chi^2(23) = 86.72, p < 0.001$ ; self-

945 generated imagery:  $\chi^2(23) = 131.51, p < 0.001$ . B. Same as a, but with results from Experiment 2:

946 cue-induced imagery:  $\chi^2(19) = 5.32, p = 0.503$ ; self-generated imagery:  $\chi^2(19) = 26.26, p < 0.001$ .

947 C. Mean angular differences between initial probe orientations and final responses, in cue-induced

948 (red) and self-generated (blue) imagery in Experiment 1. Colored circles indicate group mean (error

949 bars denote  $\pm 1$  SEM), gray lines indicated results from individual participants. Differences were

950 averaged across trials for each participant and evaluated using one-sample t-test against 0: cue-

951 induced imagery:  $t(23) = 0.75, p = 0.463$ ; self-generated imagery:  $t(23) = 0.66, p = 0.518$ ; D. Same

952 as C, but with results from Experiment 2: cue-induced imagery:  $t(19) = 1.07, p = 0.297$ ; self-

953 generated imagery:  $t(19) = 1.04, p = 0.31$ .

954



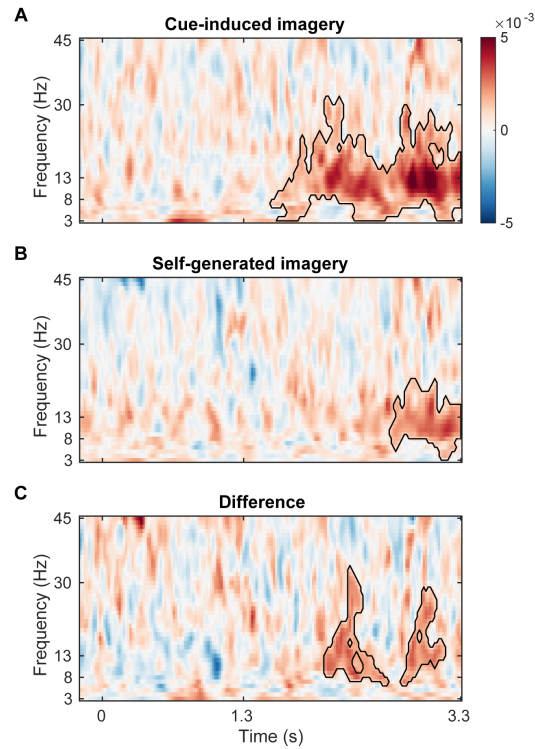

970

971 **Figure S4.** IEM results in frequencies from 3 to 45 Hz in EEG.

972 Orientation representational strength, as reconstructed from power data in frequencies from 3 to 45  
973 Hz in posterior electrodes of EEG, in cue-induced imagery (top), self-generated imagery (middle),  
974 and in difference between the two (bottom). X axis denotes time, and y axis denotes frequencies.  
975 Circled areas denote significant clusters determined using a cluster-based permutation method.

976

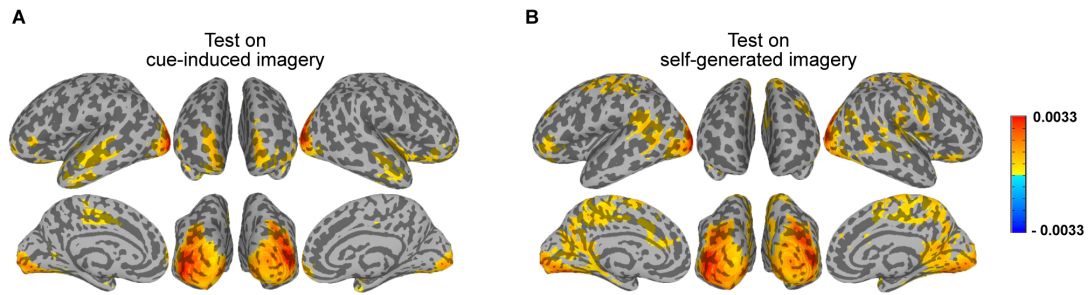

977

978 **Figure S5.** Whole-brain neural representations of imagery contents in late delay with a perception  
979 IEM.

980 A. Searchlight parametric map of the strength of orientation representations in late delay (9-12 s; 6  
981 s after retrocue) in cue-induced imagery, using an IEM trained from perception data. Colors on the  
982 cortical surface denote brain regions with significant orientation representations, corrected using a  
983 cluster-based permutation method ( $p < 0.01$ ). For demonstration purposes, clusters were thresholded  
984 at 50 voxels. B. Same as A, but with results from self-generated imagery.

985

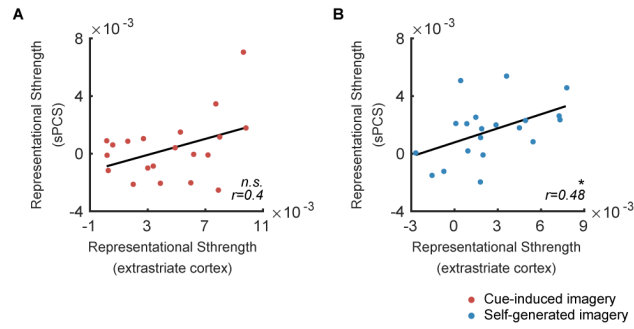

986

987 **Figure S6.** Correlations between the representational strength in right extrastriate cortex and sPCS.

988 A. Pearson correlation between the representational strength in right extrastriate cortex and that in  
989 right sPCS in cue-induced imagery. B. Pearson correlation between the representational strength in  
990 right extrastriate cortex and that in right sPCS in self-generated imagery. Each dot represented  
991 individual participant. Representational strength in right extrastriate cortex (x axis) and  
992 representational strength in right sPCS (y axis) were averaged across trials for each participant.  
993 Black lines represented the best linear fit.

994

995 **References**

- 996 1. Pearson, J. (2019). The human imagination: the cognitive neuroscience of visual mental  
997 imagery. *Nat Rev Neurosci* 20, 624-634. 10.1038/s41583-019-0202-9.
- 998 2. Lee, S.H., Kravitz, D.J., and Baker, C.I. (2012). Disentangling visual imagery and  
999 perception of real-world objects. *Neuroimage* 59, 4064-4073.  
1000 10.1016/j.neuroimage.2011.10.055.
- 1001 3. Ganis, G., Thompson, W.L., and Kosslyn, S.M. (2004). Brain areas underlying visual  
1002 mental imagery and visual perception: an fMRI study. *Brain Res Cogn Brain Res* 20, 226-  
1003 241. 10.1016/j.cogbrainres.2004.02.012.
- 1004 4. Xie, S., Kaiser, D., and Cichy, R.M. (2020). Visual Imagery and Perception Share Neural  
1005 Representations in the Alpha Frequency Band. *Curr Biol* 30, 2621-2627 e2625.  
1006 10.1016/j.cub.2020.04.074.
- 1007 5. Bosch, S.E., Jehee, J.F., Fernandez, G., and Doeller, C.F. (2014). Reinstatement of  
1008 associative memories in early visual cortex is signaled by the hippocampus. *J Neurosci* 34,  
1009 7493-7500. 10.1523/JNEUROSCI.0805-14.2014.
- 1010 6. Dijkstra, N., Mostert, P., Lange, F.P., Bosch, S., and van Gerven, M.A. (2018). Differential  
1011 temporal dynamics during visual imagery and perception. *Elife* 7. 10.7554/eLife.33904.
- 1012 7. Bainbridge, W.A., Hall, E.H., and Baker, C.I. (2021). Distinct Representational Structure  
1013 and Localization for Visual Encoding and Recall during Visual Imagery. *Cereb Cortex* 31,  
1014 1898-1913. 10.1093/cercor/bhaa329.
- 1015 8. Albers, A.M., Kok, P., Toni, I., Dijkerman, H.C., and de Lange, F.P. (2013). Shared  
1016 representations for working memory and mental imagery in early visual cortex. *Curr Biol*  
1017 23, 1427-1431. 10.1016/j.cub.2013.05.065.
- 1018 9. Iamshchinina, P., Kaiser, D., Yakupov, R., Haenelt, D., Sciarra, A., Mattern, H., Luesebrink,  
1019 F., Duezel, E., Speck, O., Weiskopf, N., and Cichy, R.M. (2021). Perceived and mentally  
1020 rotated contents are differentially represented in cortical depth of V1. *Commun Biol* 4, 1069.  
1021 10.1038/s42003-021-02582-4.
- 1022 10. Reddy, L., Tsuchiya, N., and Serre, T. (2010). Reading the mind's eye: decoding category  
1023 information during mental imagery. *Neuroimage* 50, 818-825.  
1024 10.1016/j.neuroimage.2009.11.084.
- 1025 11. Dijkstra, N., Zeidman, P., Ondobaka, S., van Gerven, M.A.J., and Friston, K. (2017).  
1026 Distinct Top-down and Bottom-up Brain Connectivity During Visual Perception and  
1027 Imagery. *Sci Rep* 7, 5677. 10.1038/s41598-017-05888-8.
- 1028 12. Mechelli, A., Price, C.J., Friston, K.J., and Ishai, A. (2004). Where bottom-up meets top-  
1029 down: neuronal interactions during perception and imagery. *Cereb Cortex* 14, 1256-1265.  
1030 10.1093/cercor/bhh087.
- 1031 13. Dentico, D., Cheung, B.L., Chang, J.Y., Guokas, J., Boly, M., Tononi, G., and Van Veen, B.  
1032 (2014). Reversal of cortical information flow during visual imagery as compared to visual  
1033 perception. *Neuroimage* 100, 237-243. 10.1016/j.neuroimage.2014.05.081.
- 1034 14. Dijkstra, N., Ambrogioni, L., Vidaurre, D., and van Gerven, M. (2020). Neural dynamics  
1035 of perceptual inference and its reversal during imagery. *Elife* 9. 10.7554/eLife.53588.
- 1036 15. Horikawa, T., and Kamitani, Y. (2017). Generic decoding of seen and imagined objects  
1037 using hierarchical visual features. *Nat Commun* 8, 15037. 10.1038/ncomms15037.
- 1038 16. Ishai, A., Ungerleider, L.G., and Haxby, J.V. (2000). Distributed neural systems for the



- 1039 generation of visual images. *Neuron* 28, 979-990. 10.1016/s0896-6273(00)00168-9.
- 1040 17. Hochstein, S., and Ahissar, M. (2002). View from the Top: Hierarchies and Reverse  
1041 Hierarchies in the Visual System. *Neuron* 36, 791-804. [https://doi.org/10.1016/S0896-](https://doi.org/10.1016/S0896-6273(02)01091-7)  
1042 [6273\(02\)01091-7](https://doi.org/10.1016/S0896-6273(02)01091-7).
- 1043 18. Smallwood, J., and Schooler, J.W. (2015). The science of mind wandering: empirically  
1044 navigating the stream of consciousness. *Annu Rev Psychol* 66, 487-518. 10.1146/annurev-  
1045 psych-010814-015331.
- 1046 19. Schacter, D.L., Addis, D.R., Hassabis, D., Martin, V.C., Spreng, R.N., and Szpunar, K.K.  
1047 (2012). The future of memory: remembering, imagining, and the brain. *Neuron* 76, 677-  
1048 694. 10.1016/j.neuron.2012.11.001.
- 1049 20. Ester, E.F., Sprague, T.C., and Serences, J.T. (2015). Parietal and Frontal Cortex Encode  
1050 Stimulus-Specific Mnemonic Representations during Visual Working Memory. *Neuron* 87,  
1051 893-905. 10.1016/j.neuron.2015.07.013.
- 1052 21. Yu, Q., and Shim, W.M. (2017). Occipital, parietal, and frontal cortices selectively maintain  
1053 task-relevant features of multi-feature objects in visual working memory. *Neuroimage* 157,  
1054 97-107. 10.1016/j.neuroimage.2017.05.055.
- 1055 22. Sprague, T.C., and Serences, J.T. (2013). Attention modulates spatial priority maps in the  
1056 human occipital, parietal and frontal cortices. *Nat Neurosci* 16, 1879-1887.  
1057 10.1038/nn.3574.
- 1058 23. Sutterer, D.W., Foster, J.J., Serences, J.T., Vogel, E.K., and Awh, E. (2019). Alpha-band  
1059 oscillations track the retrieval of precise spatial representations from long-term memory. *J*  
1060 *Neurophysiol* 122, 539-551. 10.1152/jn.00268.2019.
- 1061 24. Bae, G.Y., and Luck, S.J. (2018). Dissociable Decoding of Spatial Attention and Working  
1062 Memory from EEG Oscillations and Sustained Potentials. *J Neurosci* 38, 409-422.  
1063 10.1523/JNEUROSCI.2860-17.2017.
- 1064 25. Barbosa, J., Lozano-Soldevilla, D., and Compte, A. (2021). Pinging the brain with visual  
1065 impulses reveals electrically active, not activity-silent, working memories. *PLoS Biol* 19,  
1066 e3001436. 10.1371/journal.pbio.3001436  
1067 10.1371/journal.pbio.3001436.g001.
- 1068 26. Koenig-Robert, R., and Pearson, J. (2019). Decoding the contents and strength of imagery  
1069 before volitional engagement. *Scientific Reports* 9. 10.1038/s41598-019-39813-y.
- 1070 27. Yu, Q., and Postle, B.R. (2021). The Neural Codes Underlying Internally Generated  
1071 Representations in Visual Working Memory. *J Cogn Neurosci*, 1-16.  
1072 10.1162/jocn\_a\_01702.
- 1073 28. Christophel, T.B., Klink, P.C., Spitzer, B., Roelfsema, P.R., and Haynes, J.D. (2017). The  
1074 Distributed Nature of Working Memory. *Trends Cogn Sci* 21, 111-124.  
1075 10.1016/j.tics.2016.12.007.
- 1076 29. Postle, B.R., and Yu, Q. (2020). Neuroimaging and the localization of function in visual  
1077 cognition. *Visual Cognition* 28, 447-452. 10.1080/13506285.2020.1777237.
- 1078 30. Noudoost, B., Chang, M.H., Steinmetz, N.A., and Moore, T. (2010). Top-down control of  
1079 visual attention. *Curr Opin Neurobiol* 20, 183-190. 10.1016/j.conb.2010.02.003.
- 1080 31. Veniero, D., Gross, J., Morand, S., Duecker, F., Sack, A.T., and Thut, G. (2021). Top-down  
1081 control of visual cortex by the frontal eye fields through oscillatory realignment. *Nat*  
1082 *Commun* 12, 1757. 10.1038/s41467-021-21979-7.

- 1083 32. Yu, Q., and Shim, W.M. (2019). Temporal-Order-Based Attentional Priority Modulates  
1084 Mnemonic Representations in Parietal and Frontal Cortices. *Cereb Cortex* 29, 3182-3192.  
1085 10.1093/cercor/bhy184.
- 1086 33. Ragni, F., Tucciarelli, R., Andersson, P., and Lingnau, A. (2020). Decoding stimulus  
1087 identity in occipital, parietal and inferotemporal cortices during visual mental imagery.  
1088 *Cortex* 127, 371-387. 10.1016/j.cortex.2020.02.020.
- 1089 34. van Kerkoerle, T., Self, M.W., Dagnino, B., Gariel-Mathis, M.A., Poort, J., van der Togt,  
1090 C., and Roelfsema, P.R. (2014). Alpha and gamma oscillations characterize feedback and  
1091 feedforward processing in monkey visual cortex. *Proc Natl Acad Sci U S A* 111, 14332-  
1092 14341. 10.1073/pnas.1402773111.
- 1093 35. Michalareas, G., Vezoli, J., van Pelt, S., Schoffelen, J.M., Kennedy, H., and Fries, P. (2016).  
1094 Alpha-Beta and Gamma Rhythms Subserve Feedback and Feedforward Influences among  
1095 Human Visual Cortical Areas. *Neuron* 89, 384-397. 10.1016/j.neuron.2015.12.018.
- 1096 36. Bastos, A.M., Vezoli, J., Bosman, C.A., Schoffelen, J.M., Oostenveld, R., Dowdall, J.R.,  
1097 De Weerd, P., Kennedy, H., and Fries, P. (2015). Visual areas exert feedforward and  
1098 feedback influences through distinct frequency channels. *Neuron* 85, 390-401.  
1099 10.1016/j.neuron.2014.12.018.
- 1100 37. Hughes, G., Desantis, A., and Waszak, F. (2013). Mechanisms of intentional binding and  
1101 sensory attenuation: the role of temporal prediction, temporal control, identity prediction,  
1102 and motor prediction. *Psychol Bull* 139, 133-151. 10.1037/a0028566.
- 1103 38. Hughes, G., and Waszak, F. (2011). ERP correlates of action effect prediction and visual  
1104 sensory attenuation in voluntary action. *Neuroimage* 56, 1632-1640.  
1105 10.1016/j.neuroimage.2011.02.057.
- 1106 39. Benazet, M., Thenault, F., Whittingstall, K., and Bernier, P.M. (2016). Attenuation of visual  
1107 refferent signals in the parietal cortex during voluntary movement. *J Neurophysiol* 116,  
1108 1831-1839. 10.1152/jn.00231.2016.
- 1109 40. Jack, B.N., Le Pelley, M.E., Han, N., Harris, A.W.F., Spencer, K.M., and Whitford, T.J.  
1110 (2019). Inner speech is accompanied by a temporally-precise and content-specific corollary  
1111 discharge. *Neuroimage* 198, 170-180. 10.1016/j.neuroimage.2019.04.038.
- 1112 41. Kiltner, K., Andersson, B.J., Houborg, C., and Ehrsson, H.H. (2018). Motor imagery  
1113 involves predicting the sensory consequences of the imagined movement. *Nat Commun* 9,  
1114 1617. 10.1038/s41467-018-03989-0.
- 1115 42. Stripeikyte, G., Pereira, M., Rognini, G., Potheegadoo, J., Blanke, O., and Faivre, N. (2021).  
1116 Increased Functional Connectivity of the Intraparietal Sulcus Underlies the Attenuation of  
1117 Numerosity Estimations for Self-Generated Words. *J Neurosci* 41, 8917-8927.  
1118 10.1523/JNEUROSCI.3164-20.2021.
- 1119 43. Miall, R.C., and Wolpert, D.M. (1996). Forward Models for Physiological Motor Control.  
1120 *Neural Networks* 9, 1265-1279. [https://doi.org/10.1016/S0893-6080\(96\)00035-4](https://doi.org/10.1016/S0893-6080(96)00035-4).
- 1121 44. D'Esposito, M., and Postle, B.R. (2015). The cognitive neuroscience of working memory.  
1122 *Annu Rev Psychol* 66, 115-142. 10.1146/annurev-psych-010814-015031.
- 1123 45. Harrison, S.A., and Tong, F. (2009). Decoding reveals the contents of visual working  
1124 memory in early visual areas. *Nature* 458, 632-635. 10.1038/nature07832.
- 1125 46. Vo, V.A., Sutterer, D.W., Foster, J.J., Sprague, T.C., Awh, E., and Serences, J.T. (2021).  
1126 Shared Representational Formats for Information Maintained in Working Memory and

- 1127 Information Retrieved from Long-Term Memory. *Cereb Cortex*. 10.1093/cercor/bhab267.
- 1128 47. Wolff, M.J., Jochim, J., Akyurek, E.G., and Stokes, M.G. (2017). Dynamic hidden states  
1129 underlying working-memory-guided behavior. *Nat Neurosci* 20, 864-871. 10.1038/nn.4546.
- 1130 48. Hardstone, R., Flounders, M.W., Zhu, M., and He, B.J. (2022). Frequency-specific neural  
1131 signatures of perceptual content and perceptual stability. *eLife* 11. 10.7554/eLife.78108.
- 1132 49. Liu, J., Spagna, A., and Bartolomeo, P. (2022). Hemispheric asymmetries in visual mental  
1133 imagery. *Brain Struct Funct* 227, 697-708. 10.1007/s00429-021-02277-w.
- 1134 50. Yu, Q., Panichello, M.F., Cai, Y., Postle, B.R., and Buschman, T.J. (2020). Delay-period  
1135 activity in frontal, parietal, and occipital cortex tracks noise and biases in visual working  
1136 memory. *PLoS Biol* 18, e3000854. 10.1371/journal.pbio.3000854.
- 1137 51. Panichello, M.F., DePasquale, B., Pillow, J.W., and Buschman, T.J. (2019). Error-correcting  
1138 dynamics in visual working memory. *Nat Commun* 10, 3366. 10.1038/s41467-019-11298-  
1139 3.
- 1140 52. Marks, D.F. (1973). Visual imagery differences in the recall of pictures. *Br J Psychol* 64,  
1141 17-24. 10.1111/j.2044-8295.1973.tb01322.x.
- 1142 53. Voss, J.L., Baym, C.L., and Paller, K.A. (2008). Accurate forced-choice recognition without  
1143 awareness of memory retrieval. *Learn Mem* 15, 454-459. 10.1101/lm.971208.
- 1144 54. Brainard, D.H. (1997). The Psychophysics Toolbox. *Spat Vis* 10, 433-436.
- 1145 55. Pelli, D.G. (1997). The VideoToolbox software for visual psychophysics: transforming  
1146 numbers into movies. *Spat Vis* 10, 437-442.
- 1147 56. Dijkstra, N., Bosch, S.E., and van Gerven, M.A. (2017). Vividness of Visual Imagery  
1148 Depends on the Neural Overlap with Perception in Visual Areas. *J Neurosci* 37, 1367-1373.  
1149 10.1523/JNEUROSCI.3022-16.2016.
- 1150 57. Fazekas, P., Nemeth, G., and Overgaard, M. (2020). Perceptual Representations and the  
1151 Vividness of Stimulus-Triggered and Stimulus-Independent Experiences. *Perspect Psychol*  
1152 *Sci* 15, 1200-1213. 10.1177/1745691620924039.
- 1153 58. Delorme, A., and Makeig, S. (2004). EEGLAB: an open source toolbox for analysis of  
1154 single-trial EEG dynamics including independent component analysis. *J Neurosci Methods*  
1155 134, 9-21.
- 1156 59. Jung, T.P., Makeig, S., Westerfield, M., Townsend, J., Courchesne, E., and Sejnowski, T.J.  
1157 (2000). Removal of eye activity artifacts from visual event-related potentials in normal and  
1158 clinical subjects. *Clin Neurophysiol* 111, 1745-1758. 10.1016/s1388-2457(00)00386-2.
- 1159 60. Drisdelle, B.L., Aubin, S., and Jolicoeur, P. (2017). Dealing with ocular artifacts on  
1160 lateralized ERPs in studies of visual-spatial attention and memory: ICA correction versus  
1161 epoch rejection. *Psychophysiology* 54, 83-99. 10.1111/psyp.12675.
- 1162 61. Cox, R.W. (1996). AFNI: software for analysis and visualization of functional magnetic  
1163 resonance neuroimages. *Comput Biomed Res* 29, 162-173.
- 1164 62. Rademaker, R.L., Chunharas, C., and Serences, J.T. (2019). Coexisting representations of  
1165 sensory and mnemonic information in human visual cortex. *Nat Neurosci* 22, 1336-1344.  
1166 10.1038/s41593-019-0428-x.
- 1167 63. Sprague, T.C., Adam, K.C.S., Foster, J.J., Rahmati, M., Sutterer, D.W., and Vo, V.A. (2018).  
1168 Inverted Encoding Models Assay Population-Level Stimulus Representations, Not Single-  
1169 Unit Neural Tuning. *eNeuro* 5. 10.1523/ENEURO.0098-18.2018.
- 1170 64. Kriegeskorte, N., Goebel, R., and Bandettini, B. (2006). Information-based functional brain

- 1171 mapping. *PNAS* *103*, 3863-3868.
- 1172 65. Fonov, V., Evans, A.C., Botteron, K., Almli, C.R., McKinstry, R.C., Collins, D.L., and  
1173 Brain Development Cooperative, G. (2011). Unbiased average age-appropriate atlases for  
1174 pediatric studies. *Neuroimage* *54*, 313-327. [10.1016/j.neuroimage.2010.07.033](https://doi.org/10.1016/j.neuroimage.2010.07.033).
- 1175 66. Hanke, M., Halchenko, Y.O., Sederberg, P.B., Hanson, S.J., Haxby, J.V., and Pollmann, S.  
1176 (2009). PyMVPA: A python toolbox for multivariate pattern analysis of fMRI data.  
1177 *Neuroinformatics* *7*, 37-53. [10.1007/s12021-008-9041-y](https://doi.org/10.1007/s12021-008-9041-y).
- 1178 67. Fischl, B., Sereno, M.I., and Dale, A.M. (1999). Cortical surface-based analysis. II:  
1179 Inflation, flattening, and a surfacebased coordinate system. *Neuroimage* *9*, 195–207.
- 1180 68. Fischl, B., Liu, A., and Dale, A.M. (2001). Automated manifold surgery: constructing  
1181 geometrically accurate and topologically correct models of the human cerebral cortex.  
1182 *IEEE Trans Med Imaging* *20*, 70-80. [10.1109/42.906426](https://doi.org/10.1109/42.906426).
- 1183 69. Stelzer, J., Chen, Y., and Turner, R. (2013). Statistical inference and multiple testing  
1184 correction in classification-based multi-voxel pattern analysis (MVPA): random  
1185 permutations and cluster size control. *Neuroimage* *65*, 69-82.  
1186 [10.1016/j.neuroimage.2012.09.063](https://doi.org/10.1016/j.neuroimage.2012.09.063).
- 1187
